# Supplementary material
Source: PubMed Central journal article supplement (PMC6888649)

**Postnatal Alveologenesis Depends on FOXF1 Signaling in c-KIT<sup>+</sup> Endothelial Progenitor  
Cells**

Xiaomeng Ren<sup>1,2</sup>, Vladimir Ustiyan<sup>1,2</sup>, Minzhe Guo<sup>2</sup>, Guolun Wang<sup>1,2</sup>, Craig Bolte<sup>1,2</sup>, Yufang  
Zhang<sup>1,2</sup>, Yan Xu<sup>2</sup>, Jeffrey A. Whitsett<sup>2</sup>, Tanya V. Kalin<sup>2</sup> and Vladimir V. Kalinichenko<sup>1,2,3\*</sup>

*<sup>1</sup>Center for Lung Regenerative Medicine, <sup>2</sup>Division of Pulmonary Biology and <sup>3</sup>Division of  
Developmental Biology, Perinatal Institute, Cincinnati Children's Research Foundation, 3333  
Burnet Ave., Cincinnati, OH 45229; USA*

**Online supplementary methods**

The data, analytic methods, and study materials will be made available upon request from the corresponding author of this manuscript to other researchers for purposes of reproducing the results or replicating the procedure. All animal studies were reviewed and approved by the Institutional Animal Care and Use Committee at the Cincinnati Children's Hospital Medical Center, Cincinnati, Ohio, USA and NIH guidelines for laboratory animal care and safety were strictly followed. Human lung tissues and sections were provided by the LungMAP Human Tissue Core at the University of Rochester directed by Gloria Pryhuber. Tissue for LungMAP was obtained via the non-profit United Network for Organ Sharing, International Institute for Advancement of Medicine and National Disease Research Interchange. Consent for use of tissue was overseen by the University of Rochester Research Subjects Review Board (RSR B00056775) and the Cincinnati Children's Hospital Medical Center Institutional Review Board (#20180852).

**Transgenic mice and neonatal hyperoxia.** *Foxf1*<sup>+/-</sup> mouse line was described previously (1). *Kit*<sup>w-sh</sup> mice we purchased from Jackson Lab. *Foxf1*<sup>fl/fl</sup> mice (2) were bred with *Pdgfb-iCreER* mice (3) to generate *Pdgfb-iCreER Foxf1*<sup>fl/fl</sup> offspring. In *Pdgfb-iCreER Foxf1*<sup>fl/fl</sup> mice, tamoxifen causes *Foxf1* deletion in endothelial cells but not in other cell types (2, 4). Tamoxifen (3 mg, Sigma) was given i.p. at P0.5 and P2.5. Newborn pups with nursing mothers were placed in 85% oxygen or room air (controls) for 3 days (P1-P3), 7 days (P1-P7) or 3 weeks (P1-P21). Nursing mothers were rotated between hyperoxia and room air to avoid maternal oxygen toxicity. Oxygen concentrations were monitored with a Miniox II monitor (Catalyst Research, Owings Mills, MD). After hyperoxia exposure, mice were returned to room air. For labeling of perfused lung vasculature, Isolectin-B4 – FITC conjugate (Vector Lab) was injected i.v. two hours prior to the lung harvest. Lung function was determined by a computer-controlled small animal ventilator Flexivent as previously described (5, 6). Animal studies were approved by the Animal Care and Use Committee of Cincinnati Children's Research Foundation.

**Flow cytometry and adoptive transfer of endothelial progenitor cells.** Flow cytometry was performed after enzyme-digestion of lung tissue as described (7, 8). Apoptotic endothelial cells were detected by Annexin V apoptosis detection kit APC (eBioscience). 7-AAD (eBioscience) was used for labeling of necrotic cells. BrdU incorporation was measured as described previously (2). Anti-CD45 (clone 30-F11), anti-CD31 (PECAM-1) (clone 390), anti-CD326 (clone G8.8), anti-c-KIT (clone 2B8), anti-VEGFR3 (clone AFL4), anti-LYVE1 (clone ALY7), anti-TIE2 (clone TEK4), anti-EMCN (clone V.7C7), anti-NRP1 (clone 3DS304M) and anti-BrdU (clone BU20A) were purchased from eBioscience. Intracellular labeling protocol with cell fixation and permeabilization was described previously (6). Anti-FLK1(clone Avas12), anti-CD34 (clone MEC14.7), anti-CD140a (clone APA5), anti-CD140b (clone APB5) and anti-VE-Cadherin (clone BV13) were purchased from BioLegend. Anti-EphB4 (clone 395810) and anti-FOXF1 (AF4798) were purchased from R&D systems. Anti-SCF (ab64677) was obtained from ABCAM. Stained cells were separated using a five-laser FACS Aria II (BD Biosciences). For adoptive transfer of endothelial progenitor cells, c-KIT<sup>+</sup> ECs (c-KIT<sup>+</sup> PECAM-1<sup>+</sup> CD45<sup>-</sup>) and c-KIT<sup>-</sup> ECs (c-KIT<sup>-</sup> PECAM-1<sup>+</sup> CD45<sup>-</sup>) were FACS-sorted from lung tissue of donor P3 mice expressing the *tdTomato* transgene inserted into *Rosa 26* locus (Jackson Lab.; C57Bl/6 background). Sorted cells were injected into the facial vein of recipient mice. 20,000 cells were used for adoptive transfer in *Foxf1*<sup>+/-</sup> and control littermates (C57Bl/6 background). 60,000 cells were used for adoptive transfer in hyperoxia-treated C57Bl/6 wild type mice.

**Single Cell RNAseq analysis.** Drop-seq RNA analyses of human postnatal day 1 (PND1) and mouse postnatal day 7 (PND7) were performed at Cincinnati Children's Hospital Medical Center. Data are available at LGEA ([https://www.lungmap.net/breath-entity-page/?entityType=none&entityId=&entityLabel=&experimentTypes\[\]=LMXT0000000016](https://www.lungmap.net/breath-entity-page/?entityType=none&entityId=&entityLabel=&experimentTypes[]=LMXT0000000016)).

Expression matrices were processed using Drop-seq tools (<http://mccarrolllab.com/download/922/>, version 1.12). For pro-filtering, we required that cells

express more than 500 genes (transcript count > 0), and less than 10% of transcript counts mapped to mitochondrial genes. Genes with transcripts detected in less than 2 cells were removed. Transcript counts in each cell were normalized by dividing by the total number of transcripts in each cell multiplied by the median number of transcripts per cell. Seurat (9) was used to detect highly variable genes and perform principle component analysis-based dimension reduction. Reduced dimensions were used for cell cluster identification using the Jaccard-Louvain clustering algorithm (10). Endothelial cell clusters were defined as *PECAM1*<sup>+</sup> (or *CDH5*<sup>+</sup>) and *PTPRC* (*CD45*)<sup>-</sup> cells. Endothelial cells were further dissected into *KIT*<sup>+</sup> (transcript count > 0) and *KIT*<sup>-</sup> (transcript count = 0). A binomial test based method (10) was used to identify differentially expressed genes in *KIT*<sup>+</sup> vs. *KIT*<sup>-</sup> endothelial cells.

**RNA preparation and quantitative real-time RT-PCR (qRT-PCR).** RNA was prepared from mouse lung tissue or FACS-sorted endothelial progenitor cells using the RNeasy micro kit (Qiagen). qRT-PCR was performed using a StepOnePlus Real-Time PCR system (Applied Biosystems) using TaqMan primers (Suppl. Table E1) (11-13). Reactions were analyzed in triplicate and expression normalized to *β-actin* mRNA.

**Immunohistochemistry and immunofluorescence.** Paraffin or frozen sections were prepared from neonatal lung tissue and stained with hematoxylin and eosin (H&E) or used for immunohistochemical staining as described (14-16). The following antibodies were used for immunohistochemistry: PECAM-1 (553370, BD Biosciences and BBA7, R&D Systems), c-KIT (3074, Cell Signaling), FOXF1 (17), NKX2.1 (18), RFP (600-401-379, Rockland),  $\alpha$ SMA (A5228, Sigma), LYVE1 (ab14917, Abcam) and Endomucin (ab106100, Abcam). Antibody complexes were detected by avidin-horseradish peroxidase complex and DAB substrate (Vector Laboratories, Burlingame, CA). Sections were counterstained with either nuclear fast red or DAPI

(both from Vector Lab). Morphometrical measurements were performed using the Image-1/Metamorph Imaging System (Universal Imaging, West Chester, PA) as described previously (5). For co-localization experiments, secondary antibodies conjugated with Alexa Fluor 488 or Alexa Fluor 594 (Invitrogen) were used (19, 20). Fluorescent images were obtained using a Zeiss Axioplan2 microscope equipped with an AxioCam MRm digital camera and AxioVision 4.3 Software (Carl Zeiss Microimaging, Thornwood, NY).

**Chip-seq.** Cross-linked chromatin was sonicated using Covaris S220 to 200-300 bp fragments. CHIP with FOXF1 antibodies (17, 21) was performed using SX-8G IP-STAR robot (Diagenode). CHIP-Seq libraries were prepared using ChIPmentation procedure and sequenced using Illumina HiSeq 2500 in the Cincinnati Children's Hospital Gene Sequencing Core. Data analysis was performed using the BioWardrobe platform (22).

**Statistical analysis.** One-way ANOVA and Student's T-test were used to determine statistical significance. Right skewed measurements were log-transformed to meet normality assumptions prior to analysis. P values less than 0.05 were considered significant. Values for all measurements were expressed as mean  $\pm$  standard deviation (SD).

## Supplemental References

1. Sen P, Dharmadhikari AV, Majewski T, Mohammad MA, Kalin TV, Zabielska J, Ren X, Bray M, Brown HM, Welty S, Thevananther S, Langston C, Szafranski P, Justice MJ, Kalinichenko VV, Gambin A, Belmont J, Stankiewicz P. Comparative analyses of lung transcriptomes in patients with alveolar capillary dysplasia with misalignment of pulmonary veins and in foxf1 heterozygous knockout mice. *PloS one* 2014; 9: e94390.
2. Ren X, Ustiyani V, Pradhan A, Cai Y, Havrilak JA, Bolte CS, Shannon JM, Kalin TV, Kalinichenko VV. FOXF1 transcription factor is required for formation of embryonic vasculature by regulating VEGF signaling in endothelial cells. *Circulation research* 2014; 115: 709-720.
3. Claxton S, Kostourou V, Jadeja S, Chambon P, Hodivala-Dilke K, Fruttiger M. Efficient, inducible Cre-recombinase activation in vascular endothelium. *Genesis* 2008; 46: 74-80.
4. Cai Y, Bolte C, Le T, Goda C, Xu Y, Kalin TV, Kalinichenko VV. FOXF1 maintains endothelial barrier function and prevents edema after lung injury. *Sci Signal* 2016; 9: ra40.
5. Xia H, Ren X, Bolte CS, Ustiyani V, Zhang Y, Shah TA, Kalin TV, Whitsett JA, Kalinichenko VV. Foxm1 regulates resolution of hyperoxic lung injury in newborns. *American journal of respiratory cell and molecular biology* 2015; 52: 611-621.
6. Ren X, Shah TA, Ustiyani V, Zhang Y, Shinn J, Chen G, Whitsett JA, Kalin TV, Kalinichenko VV. FOXM1 promotes allergen-induced goblet cell metaplasia and pulmonary inflammation. *Molecular and cellular biology* 2013; 33: 371-386.
7. Ren X, Zhang Y, Snyder J, Cross ER, Shah TA, Kalin TV, Kalinichenko VV. Forkhead box M1 transcription factor is required for macrophage recruitment during liver repair. *Molecular and cellular biology* 2010; 30: 5381-5393.
8. Balli D, Ren X, Chou FS, Cross E, Zhang Y, Kalinichenko VV, Kalin TV. Foxm1 transcription factor is required for macrophage migration during lung inflammation and tumor formation. *Oncogene* 2012; 31: 3875-3888.
9. Satija R, Farrell JA, Gennert D, Schier AF, Regev A. Spatial reconstruction of single-cell gene expression data. *Nature biotechnology* 2015; 33: 495-502.
10. Shekhar K, Lapan SW, Whitney IE, Tran NM, Macosko EZ, Kowalczyk M, Adiconis X, Levin JZ, Nemesh J, Goldman M, McCarroll SA, Cepko CL, Regev A, Sanes JR. Comprehensive Classification of Retinal Bipolar Neurons by Single-Cell Transcriptomics. *Cell* 2016; 166: 1308-1323 e1330.
11. Wang IC, Meliton L, Ren X, Zhang Y, Balli D, Snyder J, Whitsett JA, Kalinichenko VV, Kalin TV. Deletion of Forkhead Box M1 transcription factor from respiratory epithelial cells inhibits pulmonary tumorigenesis. *PloS one* 2009; 4: e6609.
12. Wang IC, Snyder J, Zhang Y, Lander J, Nakafuku Y, Lin J, Chen G, Kalin TV, Whitsett JA, Kalinichenko VV. Foxm1 Mediates Cross Talk between Kras/Mitogen-Activated Protein Kinase and Canonical Wnt Pathways during Development of Respiratory Epithelium. *Molecular and cellular biology* 2012; 32: 3838-3850.
13. Wang IC, Ustiyani V, Zhang Y, Cai Y, Kalin TV, Kalinichenko VV. Foxm1 transcription factor is required for the initiation of lung tumorigenesis by oncogenic Kras(G12D.). *Oncogene* 2014; 33: 5391-5396.
14. Kim IM, Zhou Y, Ramakrishna S, Hughes DE, Solway J, Costa RH, Kalinichenko VV. Functional characterization of evolutionary conserved DNA regions in forkhead box f1 gene locus. *The Journal of biological chemistry* 2005; 280: 37908-37916.
15. Kalinichenko VV, Gusarova GA, Shin B, Costa R. The Forkhead Box F1 Transcription Factor is Expressed in Brain and Head Mesenchyme during Mouse Embryonic Development. *Gene Expression Patterns* 2003; 3: 153-158.
16. Wang X, Bhattacharyya D, Dennewitz MB, Zhou Y, Kalinichenko VV, Lepe R, Costa RH. Rapid Hepatocyte Nuclear Translocation of the Forkhead Box M1B (FoxM1B)

- Transcription factor Causes a Transient Increase in Size of Regenerating Transgenic Hepatocytes. *Gene Expression* 2003; 11: 149-162.
17. Hoggatt AM, Kim JR, Ustiyanyan V, Ren X, Kalin TV, Kalinichenko VV, Herring BP. The transcription factor Foxf1 binds to serum response factor and myocardin to regulate gene transcription in visceral smooth muscle cells. *The Journal of biological chemistry* 2013; 288: 28477-28487.
  18. Ustiyanyan V, Zhang Y, Perl AK, Whitsett JA, Kalin TV, Kalinichenko VV. beta-catenin and Kras/Foxm1 signaling pathway are critical to restrict Sox9 in basal cells during pulmonary branching morphogenesis. *Dev Dyn* 2016; 245: 590-604.
  19. Wang IC, Zhang Y, Snyder J, Sutherland MJ, Burhans MS, Shannon JM, Park HJ, Whitsett JA, Kalinichenko VV. Increased expression of FoxM1 transcription factor in respiratory epithelium inhibits lung sacculation and causes Clara cell hyperplasia. *Developmental biology* 2010; 347: 301-314.
  20. Ustiyanyan V, Wert SE, Ikegami M, Wang IC, Kalin TV, Whitsett JA, Kalinichenko VV. Foxm1 transcription factor is critical for proliferation and differentiation of Clara cells during development of conducting airways. *Developmental biology* 2012; 370: 198-212.
  21. Bolte C, Ren X, Tomley T, Ustiyanyan V, Pradhan A, Hoggatt A, Kalin TV, Herring BP, Kalinichenko VV. Forkhead box F2 regulation of platelet-derived growth factor and myocardin/serum response factor signaling is essential for intestinal development. *The Journal of biological chemistry* 2015; 290: 7563-7575.
  22. Bolte C, Flood HM, Ren X, Jagannathan S, Barski A, Kalin TV, Kalinichenko VV. FOXF1 transcription factor promotes lung regeneration after partial pneumonectomy. *Sci Rep* 2017; 7: 10690.

**Supplemental Table E1.** qRT-PCR TaqMan gene expression assays.

| Gene           | Cat.#         |
|----------------|---------------|
| <i>Foxf1</i>   | Mm00487497_m1 |
| <i>Kit</i>     | Mm00445212_m1 |
| <i>Cdh5</i>    | Mm00486938_m1 |
| <i>Pecam1</i>  | Mm01242584_m1 |
| <i>β-actin</i> | Mm00607939_s1 |

**Supplemental Table E2.** Overlap in gene expression changes between human and mouse endothelial progenitor cells isolated from neonatal lungs.

| Gene                                           | Name                                                   | Human<br>c-KIT <sup>+</sup> /c-KIT <sup>-</sup> | Human<br>P value | Mouse<br>c-KIT <sup>+</sup> /c-KIT <sup>-</sup> | Mouse<br>P value |
|------------------------------------------------|--------------------------------------------------------|-------------------------------------------------|------------------|-------------------------------------------------|------------------|
| <b>Transcription Factors/ Nuclear Proteins</b> |                                                        |                                                 |                  |                                                 |                  |
| <i>AHNAK</i>                                   | AHNAK nucleoprotein (desmoyokin)                       | 1.45                                            | 2.5E-04          | 1.36                                            | 9.5E-08          |
| <i>ANKRD11</i>                                 | Ankyrin repeat domain 11                               | 1.38                                            | 1.1E-03          | 1.26                                            | 1.3E-05          |
| <i>ANKRD12</i>                                 | Ankyrin repeat domain 12                               | 1.39                                            | 1.6E-03          | 1.35                                            | 1.8E-04          |
| <i>ARID4B</i>                                  | AT-rich interaction domain 4B                          | 1.39                                            | 4.2E-03          | 1.26                                            | 2.2E-04          |
| <i>CASZ1</i>                                   | Castor zinc finger 1                                   | 1.9                                             | 7.1E-04          | 1.43                                            | 4.9E-09          |
| <i>CHD6</i>                                    | Chromodomain helicase DNA binding protein 6            | 2.0                                             | 9.1E-05          | 1.70                                            | 1.7E-09          |
| <i>DDX24</i>                                   | DEAD-box helicase 24                                   | 1.60                                            | 2.7E-03          | 1.39                                            | 5.8E-06          |
| <i>DDX46</i>                                   | DEAD-box helicase 46                                   | 1.49                                            | 3.6E-03          | 1.34                                            | 6.2E-06          |
| <i>DDX6</i>                                    | DEAD-box helicase 6                                    | 1.76                                            | 1.8E-03          | 1.29                                            | 2.3E-06          |
| <i>DEK</i>                                     | DEK proto-oncogene                                     | 1.46                                            | 1.6E-03          | 1.27                                            | 1.4E-05          |
| <i>EID1</i>                                    | EP300 interacting inhibitor of differentiation 1       | 1.61                                            | 1.4E-03          | 1.41                                            | 1.9E-08          |
| <i>ERG</i>                                     | ERG, ETS transcription factor                          | 1.75                                            | 3.7E-04          | 1.31                                            | 6.4E-09          |
| <i>EWSR1</i>                                   | EWS RNA binding protein 1                              | 1.88                                            | 1.8E-05          | 1.26                                            | 1.4E-04          |
| <i>FENDRR</i>                                  | FOXF1 adjacent non-coding developmental regulatory RNA | 1.51                                            | 1.1E-03          | 1.31                                            | 2.1E-09          |
| <i>FOXF1</i>                                   | FOXF1, Forkhead box F1                                 | 1.60                                            | 6.1E-03          | 1.37                                            | 3.7E-06          |
| <i>FUS</i>                                     | FUS RNA binding protein                                | 1.75                                            | 5.4E-05          | 1.26                                            | 1.3E-08          |
| <i>GPBP1</i>                                   | GC-rich promoter binding protein 1                     | 1.72                                            | 2.4E-03          | 1.72                                            | 4.8E-11          |
| <i>HDAC7</i>                                   | Histone deacetylase 7                                  | 1.85                                            | 2.7E-05          | 1.35                                            | 1.7E-06          |
| <i>HMGN1</i>                                   | High mobility group nucleosome binding domain 1        | 1.64                                            | 5.0E-03          | 1.40                                            | 7.9E-12          |
| <i>HNRNPA0</i>                                 | Heterogeneous nuclear ribonucleoprotein A0             | 1.62                                            | 2.3E-03          | 1.43                                            | 1.1E-06          |
| <i>HNRNPA1</i>                                 | Heterogeneous nuclear ribonucleoprotein A1             | 1.83                                            | 5.7E-04          | 1.24                                            | 1.7E-04          |
| <i>HNRNPF</i>                                  | Heterogeneous nuclear ribonucleoprotein F              | 1.78                                            | 2.3E-03          | 1.32                                            | 1.2E-09          |
| <i>HNRNPH3</i>                                 | Heterogeneous nuclear ribonucleoprotein H3             | 1.67                                            | 3.5E-04          | 1.34                                            | 1.9E-04          |
| <i>HNRNPL</i>                                  | Heterogeneous nuclear ribonucleoprotein L              | 1.68                                            | 5.0E-03          | 1.57                                            | 3.7E-11          |
| <i>KLF6</i>                                    | Kruppel like factor 6                                  | 1.48                                            | 1.1E-03          | 1.25                                            | 1.7E-04          |
| <i>NEMF</i>                                    | Nuclear export mediator factor                         | 1.67                                            | 1.3E-03          | 1.39                                            | 3.4E-05          |
| <i>NFIA</i>                                    | Nuclear factor I A                                     | 1.62                                            | 4.9E-03          | 1.35                                            | 3.4E-06          |



|                                                   |                                                     |      |         |      |         |
|---------------------------------------------------|-----------------------------------------------------|------|---------|------|---------|
| <i>PP1G</i>                                       | Peptidylprolyl isomerase G                          | 1.51 | 5.0E-04 | 1.23 | 1.9E-05 |
| <i>QKI</i>                                        | QKI, KH domain containing RNA binding               | 1.45 | 4.6E-04 | 1.34 | 6.6E-08 |
| <i>S100A16</i>                                    | S100 calcium binding protein A16                    | 1.93 | 4.3E-04 | 1.22 | 2.5E-11 |
| <i>SAFB2</i>                                      | Scaffold attachment factor B2                       | 1.77 | 2.0E-03 | 1.46 | 3.2E-07 |
| <i>SNRK</i>                                       | SNF related kinase                                  | 1.74 | 3.2E-03 | 1.42 | 3.8E-08 |
| <i>SNRPD3</i>                                     | Small nuclear ribonucleoprotein D3 polypeptide      | 1.81 | 1.9E-03 | 1.33 | 4.5E-09 |
| <i>SNU13</i>                                      | Small nuclear ribonucleoprotein 13                  | 1.92 | 1.1E-03 | 1.58 | 2.7E-10 |
| <i>SOX18</i>                                      | SOX18, SRY-box 18                                   | 1.83 | 2.6E-04 | 1.25 | 2.0E-03 |
| <i>SOX7</i>                                       | SOX7, SRY-box 7                                     | 1.64 | 5.0E-03 | 1.68 | 2.2E-10 |
| <i>TCIM</i>                                       | Transcriptional and immune response regulator       | 1.32 | 1.4E-04 | 1.67 | 1.5E-11 |
| <i>THRAP3</i>                                     | Thyroid hormone receptor associated protein 3       | 1.63 | 2.4E-03 | 1.25 | 1.3E-05 |
| <i>WWTR1</i>                                      | TAZ, WW domain containing transcription regulator 1 | 1.70 | 6.0E-05 | 1.80 | 9.6E-16 |
| <i>ZFP36L1</i>                                    | ZFP36 ring finger protein like 1                    | 1.24 | 4.2E-03 | 1.30 | 8.8E-09 |
| <i>ZNF292</i>                                     | Zinc finger protein 292                             | 1.68 | 2.8E-03 | 1.31 | 6.5E-04 |
| <i>ZNF503</i>                                     | Zinc finger protein 503                             | 1.64 | 5.0E-03 | 1.62 | 2.7E-12 |
| <b>Receptors/ Adhesion Molecules</b>              |                                                     |      |         |      |         |
| <i>ADGRL2</i>                                     | Adhesion G protein-coupled receptor L2              | 1.71 | 2.9E-06 | 1.39 | 2.0E-07 |
| <i>APLNR</i>                                      | Apelin receptor                                     | 1.59 | 3.1E-03 | 1.81 | 9.7E-19 |
| <i>BSG</i>                                        | Basigin (Ok blood group)                            | 1.97 | 5.5E-04 | 1.21 | 1.7E-03 |
| <i>CAV1</i>                                       | Caveolin 1                                          | 1.21 | 2.2E-04 | 1.2  | 8.0E-14 |
| <i>CD34</i>                                       | CD34 molecule                                       | 1.33 | 1.9E-04 | 1.28 | 3.1E-08 |
| <i>CD36</i>                                       | CD36 molecule                                       | 1.84 | 2.4E-07 | 1.23 | 7.1E-12 |
| <i>CD93</i>                                       | CD93 molecule                                       | 1.56 | 1.1E-05 | 1.25 | 4.0E-14 |
| <i>CDH5</i>                                       | VE-cadherin (CD144)                                 | 1.30 | 1.9E-04 | 1.20 | 7.1E-07 |
| <i>EFNB1</i>                                      | Ephrin B1                                           | 1.65 | 3.7E-03 | 1.68 | 2.2E-10 |
| <i>EFNB2</i>                                      | Ephrin B2                                           | 1.68 | 5.0E-03 | 1.28 | 1.2E-05 |
| <i>EMCN</i>                                       | Endomucin                                           | 1.37 | 3.1E-05 | 1.49 | 1.9E-13 |
| <i>ENG</i>                                        | Endoglin (CD105)                                    | 1.61 | 1.9E-04 | 1.25 | 4.7E-05 |
| <i>IFNGR1</i>                                     | Interferon gamma receptor 1 (CD119)                 | 1.56 | 1.0E-03 | 1.44 | 6.8E-09 |
| <i>JCAD</i>                                       | Junctional cadherin 5 associated                    | 1.52 | 1.7E-04 | 1.37 | 6.1E-06 |
| <i>KDR</i>                                        | FLK1, VEGF Receptor 2 (CD309)                       | 1.57 | 5.7E-06 | 1.21 | 4.2E-06 |
| <i>KIT</i>                                        | KIT proto-oncogene receptor tyrosine kinase (CD117) | 558  | 2E-253  | 667  | 0.0E-00 |
| <i>ROBO4</i>                                      | Roundabout guidance receptor 4                      | 1.70 | 5.6E-07 | 1.39 | 1.0E-04 |
| <i>TEK</i>                                        | TIE2 TEK receptor tyrosine kinase (CD202B)          | 1.82 | 5.0E-04 | 1.38 | 1.1E-10 |
| <i>THSD1</i>                                      | Thrombospondin type 1 domain containing 1           | 2.62 | 7.0E-10 | 1.96 | 9.3E-16 |
| <i>TSPAN12</i>                                    | Tetraspanin 12                                      | 1.37 | 2.4E-03 | 1.52 | 2.5E-06 |
| <i>TSPAN18</i>                                    | Tetraspanin 18                                      | 2.53 | 1.7E-07 | 1.25 | 1.4E-06 |
| <b>Secreted Proteins/ Extracellular Mediators</b> |                                                     |      |         |      |         |
| <i>AGRN</i>                                       | Agrin                                               | 1.49 | 1.7E-03 | 1.25 | 2.0E-03 |
| <i>EDN1</i>                                       | Endothelin 1                                        | 1.74 | 2.6E-07 | 1.29 | 6.9E-06 |
| <i>KITLG</i>                                      | KIT ligand (Stem cell factor)                       | 1.69 | 3.6E-04 | 1.25 | 4.0E-07 |
| <i>SELENOP</i>                                    | Selenoprotein P                                     | 1.54 | 1.9E-03 | 1.21 | 5.3E-07 |
| <i>SH3BGRL</i>                                    | SH3 domain binding glutamate rich protein like      | 1.90 | 9.7E-04 | 1.22 | 8.0E-05 |
| <i>SPARCL1</i>                                    | SPARC like 1 (hevin)                                | 1.40 | 7.5E-08 | 1.33 | 2.4E-14 |
| <i>TNFSF10</i>                                    | TNF superfamily member 10 (TRAIL)                   | 1.40 | 1.0E-04 | 1.45 | 3.0E-11 |

| <b>Cytoplasmic Proteins/ Intracellular Mediators/ Enzymes/ Adaptor Proteins</b> |                                                                                  |      |         |      |         |
|---------------------------------------------------------------------------------|----------------------------------------------------------------------------------|------|---------|------|---------|
| <i>ABCF1</i>                                                                    | ATP binding cassette subfamily F member 1                                        | 1.89 | 4.6E-04 | 1.38 | 5.3E-08 |
| <i>ACTN4</i>                                                                    | Actinin alpha 4                                                                  | 1.43 | 2.2E-04 | 1.24 | 1.8E-08 |
| <i>ACTR2</i>                                                                    | ARP2 actin related protein 2 homolog                                             | 1.85 | 1.6E-04 | 1.30 | 3.4E-05 |
| <i>ADCY4</i>                                                                    | Adenylate cyclase 4                                                              | 1.64 | 5.0E-03 | 1.23 | 2.9E-03 |
| <i>ALDH2</i>                                                                    | Aldehyde dehydrogenase 2 family member                                           | 1.84 | 2.5E-03 | 1.46 | 1.4E-10 |
| <i>APPL1</i>                                                                    | Adaptor protein, phosphotyrosine interacting with PH domain and leucine zipper 1 | 1.84 | 2.5E-03 | 1.6  | 7.4E-07 |
| <i>ARAP3</i>                                                                    | ArfGAP with RhoGAP domain, ankyrin repeat and PH domain 3                        | 1.61 | 6.2E-04 | 1.50 | 1.3E-07 |
| <i>ARF1</i>                                                                     | ADP ribosylation factor 1                                                        | 1.84 | 4.2E-04 | 1.21 | 4.5E-07 |
| <i>ARHGAP18</i>                                                                 | Rho GTPase activating protein 18                                                 | 1.58 | 1.1E-04 | 1.70 | 7.4E-09 |
| <i>ARHGEF15</i>                                                                 | Rho guanine nucleotide exchange factor 15                                        | 1.68 | 2.8E-03 | 1.34 | 2.0E-04 |
| <i>ARPP19</i>                                                                   | cAMP regulated phosphoprotein 19                                                 | 2.41 | 9.0E-06 | 1.33 | 3.9E-07 |
| <i>ATP5MPL</i>                                                                  | ATP synthase membrane subunit 6.8PL                                              | 1.70 | 3.7E-03 | 1.41 | 2.8E-11 |
| <i>CAPNS1</i>                                                                   | Calpain small subunit 1                                                          | 1.86 | 7.5E-04 | 1.53 | 1.1E-08 |
| <i>CARHSP1</i>                                                                  | Calcium regulated heat stable protein 1                                          | 1.59 | 2.6E-03 | 1.42 | 7.6E-07 |
| <i>CCDC85B</i>                                                                  | Coiled-coil domain containing 85B                                                | 1.67 | 1.4E-05 | 1.39 | 1.5E-05 |
| <i>CLTC</i>                                                                     | Clathrin heavy chain                                                             | 1.66 | 1.8E-03 | 1.25 | 6.0E-03 |
| <i>COPS9</i>                                                                    | COP9 signalosome subunit 9                                                       | 1.86 | 2.1E-03 | 1.43 | 1.2E-07 |
| <i>DAZAP2</i>                                                                   | DAZ associated protein 2                                                         | 1.66 | 2.4E-04 | 1.21 | 1.2E-02 |
| <i>DHRS7</i>                                                                    | Dehydrogenase/reductase 7                                                        | 2.0  | 4.5E-04 | 1.56 | 6.1E-08 |
| <i>DLC1</i>                                                                     | DLC1 Rho GTPase activating protein                                               | 1.78 | 7.0E-04 | 1.73 | 8.1E-21 |
| <i>DOCK9</i>                                                                    | Dedicator of cytokinesis 9                                                       | 1.68 | 2.8E-03 | 1.25 | 6.6E-03 |
| <i>DPYSL2</i>                                                                   | Dihydropyrimidinase like 2                                                       | 1.52 | 5.8E-04 | 1.74 | 2.2E-16 |
| <i>DPYSL3</i>                                                                   | Dihydropyrimidinase like 3                                                       | 1.91 | 4.4E-05 | 1.71 | 2.8E-08 |
| <i>DUSP6</i>                                                                    | Dual specificity phosphatase 6                                                   | 1.84 | 3.0E-06 | 1.67 | 3.1E-22 |
| <i>EEF1D</i>                                                                    | Eukaryotic translation elongation factor 1 delta                                 | 1.48 | 1.0E-03 | 1.38 | 2.0E-05 |
| <i>EIF4H</i>                                                                    | Eukaryotic translation initiation factor 4H                                      | 1.78 | 3.1E-03 | 1.32 | 6.6E-05 |
| <i>EVA1B</i>                                                                    | eva-1 homolog B                                                                  | 1.71 | 2.6E-04 | 1.29 | 1.5E-03 |
| <i>FNBP1L</i>                                                                   | Formin binding protein 1 like                                                    | 2.31 | 6.5E-05 | 1.36 | 9.4E-12 |
| <i>GBP4</i>                                                                     | Guanylate binding protein 4                                                      | 1.72 | 5.2E-04 | 1.37 | 1.9E-05 |
| <i>GCC2</i>                                                                     | GRIP and coiled-coil domain containing 2                                         | 1.71 | 2.2E-04 | 1.42 | 1.5E-10 |
| <i>GIMAP4</i>                                                                   | GTPase, IMAP family member 4                                                     | 1.82 | 1.1E-03 | 1.33 | 2.7E-09 |
| <i>GNB1</i>                                                                     | G protein subunit beta 1                                                         | 1.57 | 1.8E-03 | 1.28 | 1.0E-04 |
| <i>GNB2</i>                                                                     | G protein subunit beta 2                                                         | 1.56 | 6.1E-04 | 1.24 | 3.2E-04 |
| <i>GSTP1</i>                                                                    | Glutathione S-transferase pi 1                                                   | 1.72 | 7.7E-06 | 1.26 | 5.8E-03 |
| <i>HPGD</i>                                                                     | 15-hydroxyprostaglandin dehydrogenase                                            | 1.28 | 1.2E-04 | 1.20 | 1.2E-11 |
| <i>ITSN2</i>                                                                    | Intersectin 2                                                                    | 1.50 | 3.8E-03 | 1.38 | 2.6E-07 |
| <i>JUP</i>                                                                      | Junction plakoglobin                                                             | 1.91 | 5.7E-07 | 1.50 | 8.1E-13 |
| <i>LARP7</i>                                                                    | La ribonucleoprotein domain family member 7                                      | 2.02 | 1.3E-05 | 1.55 | 1.7E-07 |
| <i>MAOA</i>                                                                     | Monoamine oxidase A                                                              | 2.32 | 2.7E-05 | 1.44 | 3.8E-06 |
| <i>MAPK3</i>                                                                    | Mitogen-activated protein kinase 3 (ERK1)                                        | 1.72 | 2.4E-03 | 1.38 | 1.6E-05 |
| <i>MRFAP1</i>                                                                   | Morf4 family associated protein 1                                                | 1.90 | 3.8E-05 | 1.41 | 7.6E-11 |
| <i>MRPL20</i>                                                                   | Mitochondrial ribosomal protein L20                                              | 1.69 | 3.2E-03 | 1.35 | 6.9E-05 |
| <i>MYLK</i>                                                                     | Myosin light chain kinase                                                        | 1.67 | 1.1E-03 | 1.23 | 3.1E-03 |
| <i>MYO1B</i>                                                                    | Myosin IB                                                                        | 1.77 | 1.3E-03 | 1.45 | 2.6E-05 |
| <i>MYO6</i>                                                                     | Myosin VI                                                                        | 1.50 | 1.3E-04 | 1.53 | 3.1E-07 |
| <i>NDUFA13</i>                                                                  | NADH:ubiquinone oxidoreductase subunit A13                                       | 1.59 | 3.6E-03 | 1.28 | 1.7E-05 |
| <i>NDUFB2</i>                                                                   | NADH:ubiquinone oxidoreductase subunit B2                                        | 1.69 | 3.2E-03 | 1.62 | 6.5E-10 |

|                |                                                    |      |         |      |         |
|----------------|----------------------------------------------------|------|---------|------|---------|
| <i>NREP</i>    | Neuronal regeneration related protein              | 1.71 | 3.2E-03 | 1.27 | 5.5E-14 |
| <i>PALMD</i>   | Palmelphin                                         | 1.78 | 1.5E-03 | 1.37 | 2.1E-07 |
| <i>PDIA6</i>   | Protein disulfide isomerase family A member 6      | 1.65 | 3.7E-03 | 1.35 | 4.3E-08 |
| <i>PEA15</i>   | Proliferation and apoptosis adaptor protein 15     | 1.57 | 1.6E-04 | 1.27 | 5.0E-05 |
| <i>PLK2</i>    | Polo like kinase 2                                 | 1.74 | 6.4E-05 | 1.25 | 1.9E-04 |
| <i>PRCP</i>    | Prolylcarboxypeptidase                             | 1.68 | 2.4E-03 | 1.66 | 6.5E-17 |
| <i>PSMB6</i>   | Proteasome subunit beta 6                          | 2.02 | 2.0E-04 | 1.24 | 2.8E-05 |
| <i>PTPN12</i>  | Protein tyrosine phosphatase, non-receptor type 12 | 1.94 | 6.7E-04 | 1.50 | 1.4E-06 |
| <i>RAB11B</i>  | RAB11B, member RAS oncogene family                 | 1.85 | 4.8E-04 | 1.39 | 1.1E-05 |
| <i>RAB1A</i>   | RAB1A, member RAS oncogene family                  | 1.69 | 3.2E-03 | 1.28 | 3.4E-07 |
| <i>RAB7A</i>   | RAB7A, member RAS oncogene family                  | 1.74 | 2.1E-03 | 1.40 | 1.6E-07 |
| <i>RAC1</i>    | Rac family small GTPase 1                          | 1.38 | 4.6E-03 | 1.65 | 1.3E-10 |
| <i>RALB</i>    | RAS like proto-oncogene B                          | 2.11 | 1.1E-05 | 1.29 | 1.0E-05 |
| <i>RASIP1</i>  | Ras interacting protein 1                          | 1.67 | 7.9E-05 | 1.47 | 2.7E-07 |
| <i>RDX</i>     | Radixin                                            | 1.40 | 1.6E-04 | 1.22 | 2.7E-09 |
| <i>RGCC</i>    | Regulator of cell cycle                            | 1.50 | 1.4E-11 | 2.02 | 4.4E-38 |
| <i>RHOC</i>    | Ras homolog family member C                        | 1.58 | 3.0E-03 | 1.33 | 8.1E-08 |
| <i>RPL18</i>   | Ribosomal protein L18                              | 1.42 | 4.3E-04 | 1.21 | 8.0E-07 |
| <i>RPL28</i>   | Ribosomal protein L28                              | 1.55 | 8.5E-05 | 1.24 | 1.6E-07 |
| <i>RPL29</i>   | Ribosomal protein L29                              | 1.70 | 2.4E-03 | 1.24 | 4.6E-07 |
| <i>RPL36AL</i> | Ribosomal protein L36a like                        | 1.79 | 1.4E-04 | 1.28 | 2.0E-07 |
| <i>RPN2</i>    | Ribophorin II                                      | 1.87 | 2.7E-05 | 1.60 | 3.1E-09 |
| <i>RSRC2</i>   | Arginine and serine rich coiled-coil 2             | 1.72 | 6.2E-05 | 1.30 | 3.5E-08 |
| <i>SDCBP</i>   | Syndecan binding protein                           | 1.64 | 3.2E-03 | 1.23 | 4.2E-05 |
| <i>SELENOF</i> | Selenoprotein F                                    | 1.70 | 2.4E-03 | 1.26 | 1.1E-05 |
| <i>SGK1</i>    | Serum/glucocorticoid regulated kinase 1            | 1.40 | 3.0E-06 | 1.32 | 7.2E-11 |
| <i>SKAP2</i>   | Src kinase associated phosphoprotein 2             | 2.19 | 7.3E-05 | 1.47 | 7.4E-07 |
| <i>SKP1</i>    | S-phase kinase associated protein 1                | 1.59 | 3.6E-03 | 1.36 | 1.1E-10 |
| <i>TMBIM6</i>  | Transmembrane BAX inhibitor motif containing 6     | 1.41 | 2.0E-03 | 1.34 | 6.5E-09 |
| <i>TMEM258</i> | Transmembrane protein 258                          | 2.11 | 2.0E-04 | 1.45 | 4.9E-12 |
| <i>TOMM7</i>   | Translocase of outer mitochondrial membrane 7      | 1.55 | 1.4E-03 | 1.30 | 6.1E-08 |
| <i>TTC3</i>    | Tetratricopeptide repeat domain 3                  | 1.48 | 4.0E-03 | 1.30 | 1.0E-03 |
| <i>VAT1</i>    | Vesicle amine transport 1                          | 1.69 | 2.6E-04 | 1.50 | 4.4E-06 |
| <i>WDR1</i>    | WD repeat domain 1                                 | 1.65 | 4.3E-03 | 1.35 | 1.8E-04 |

Bioinformatic analysis of single cell RNAseq was performed separately between human c-KIT<sup>+</sup> ECs (n=92) and c-KIT<sup>-</sup> ECs (n=558) and mouse c-KIT<sup>+</sup> ECs (n=383) and c-KIT<sup>-</sup> ECs (n=667). Table shows statistically significant similarities in gene expression changes between human and mouse EC progenitors. Expression levels are presented as c-KIT<sup>+</sup>EC/c-KIT<sup>-</sup>EC ratios. FOXF1 target genes are shown in red.

**Supplemental Table E3.** FOXF1-binding DNA regions identified by ChIPseq of mouse fetal lung MFLM-91U cells.

| GENE           | TXSTART   | STRAND | CHROM | Binding sites |              |           |
|----------------|-----------|--------|-------|---------------|--------------|-----------|
|                |           |        |       | 1             | 2            | 3         |
| <i>Ahnak</i>   | 8989284   | +      | chr19 | 326 / 574     |              |           |
| <i>Carhsp1</i> | 8672153   | -      | chr16 | -849 / -564   |              |           |
| <i>Cav1</i>    | 17306335  | +      | chr6  | -682 / -196   |              |           |
| <i>Ddx24</i>   | 103425867 | -      | chr12 | -151 / 454    |              |           |
| <i>Ddx46</i>   | 55635027  | +      | chr13 | -19 / 124     |              |           |
| <i>Dpysl3</i>  | 43393331  | -      | chr18 | 301 / 739     |              |           |
| <i>Dusp6</i>   | 99263231  | +      | chr10 | -488 / 145    | -1070 / -847 |           |
| <i>Edn1</i>    | 42301270  | +      | chr13 | 177 / 473     |              |           |
| <i>Eif4h</i>   | 134639328 | -      | chr5  | -1336 / -717  |              |           |
| <i>Fendrr</i>  | 121084386 | -      | chr8  | -66 / -489    |              |           |
| <i>Foxf1</i>   | 121084386 | +      | chr8  | 237 / 402     | -1287 / -864 |           |
| <i>Gcc2</i>    | 58255526  | +      | chr10 | -653 / -301   |              |           |
| <i>Hdac7</i>   | 97831767  | -      | chr15 | -330 / 710    | -1252 / -961 |           |
| <i>Hnrnpa1</i> | 103239816 | -      | chr15 | -260 / -7     | 520 / 663    |           |
| <i>Hnrnpf</i>  | 117906782 | +      | chr6  | -868 / -497   | -905 / -757  |           |
| <i>Jup</i>     | 100397790 | -      | chr11 | -74 / 516     |              |           |
| <i>Larp7</i>   | 127553489 | +      | chr3  | 636 / 904     |              |           |
| <i>Mapk3</i>   | 126759626 | +      | chr7  | 671 / 1363    |              |           |
| <i>Mrfap1</i>  | 36796754  | -      | chr5  | 474 / 962     |              |           |
| <i>Myo1b</i>   | 51915974  | -      | chr1  | -1142 / -909  |              |           |
| <i>Ndufb2</i>  | 39592583  | +      | chr6  | -1141 / -951  | -712 / 56    | 614 / 834 |
| <i>Ppig</i>    | 69723088  | +      | chr2  | -711 / -568   |              |           |
| <i>Psmb6</i>   | 70525357  | +      | chr11 | -588 / -414   |              |           |
| <i>Rab11b</i>  | 33760486  | -      | chr17 | 38 / 184      |              |           |
| <i>Sdcbp</i>   | 6365680   | +      | chr4  | -1139 / -347  | 801 / 1247   |           |
| <i>Tmbim6</i>  | 99392947  | +      | chr15 | -587 / 359    |              |           |
| <i>Tomm7</i>   | 23844145  | -      | chr5  | -974 / -711   |              |           |
| <i>Ttc3</i>    | 94371015  | -      | chr16 | 599 / 1136    |              |           |
| <i>Wwtr1</i>   | 57575910  | -      | chr3  | -305 / 90     |              |           |

## SUPPLEMENTAL FIGURE LEGENDS

**Supplemental Figure. E1. c-KIT<sup>+</sup> endothelial progenitor cells are present in the developing mouse lung.** Immunostaining shows that c-KIT<sup>+</sup> co-localizes with PECAM-1 (arrowheads) in subset of EC of pulmonary blood vessels (V) and lung parenchyma of wild-type E16.5 and P7 mice (A) and human neonatal lung (B). Magnification: panel A, x400 (inserts are x1000); panel B, x200 (inserts are x1000);

**Supplemental Figure. E2. c-KIT<sup>+</sup> endothelial progenitor cells express CD34.** FACS analysis of collagenase-digested P7 mouse lungs shows that c-KIT<sup>+</sup> ECs (c-KIT<sup>+</sup> PECAM-1<sup>+</sup> CD45<sup>-</sup>) express CD34. c-KIT<sup>+</sup> ECs are negative for CD140b (PDGFRb), CD140a (PDGFRa), CD326 (EPCAM), NRP1, EphB4 and LYVE1. Cell viability was determined by 7-AAD.

**Supplemental Figure. E3. Gene ontology (GO) biological processes enriched in human and mouse c-KIT<sup>+</sup> endothelial progenitor cells.** (A) Histograms show significantly enriched biological processes in human c-KIT<sup>+</sup> ECs (n=92 cells) compared to c-KIT<sup>-</sup> ECs (n=558) isolated from human postnatal day 1 lung (PND1). ToppGene software suite was used for functional enrichment analysis. (B) Histograms show significantly enriched biological processes in mouse c-KIT<sup>+</sup> ECs (n=383 cells) compared to c-KIT<sup>-</sup> ECs (n=667) isolated from mouse postnatal day 7 lung (PND7). Single-cell RNAseq datasets were obtained from the Lung Gene Expression Analysis (LGEA) Web Portal (<https://research.cchmc.org/pbge/lunggens/mainportal.html>).

**Supplemental Figure. E4. Gene expression profile in mouse c-KIT<sup>+</sup> endothelial progenitor cells.** (A) Heatmap visualization of genes differentially expressed in mouse c-KIT<sup>+</sup> ECs. A binomial test-based method was used to compare the expression of genes between 383 c-KIT<sup>+</sup> and 667 c-KIT<sup>-</sup> ECs isolated from mouse P7 lungs. Mouse single-cell RNAseq dataset was

obtained from the Lung Gene Expression Analysis (LGEA) Web Portal (<https://research.cchmc.org/pbge/lunggens/mainportal.html>). Gene expression profiles were clustered using hierarchical clustering with Pearson's correlation-based distance and complete linkage. Gene expression was Z-score normalized for visualization. GENE-E (<https://software.broadinstitute.org/GENE-E/>) was used to perform hierarchical clustering and heatmap visualization of gene expression. **(B)** Violin plots of the expression of *Foxf1*, *Kit*, *Tek*, *Cdh5*, *Vwf* and *Cd34* in mouse c-KIT<sup>+</sup> and c-KIT<sup>-</sup> ECs. Grey points indicate the gene expression in individual cells, measured in Unique Molecular Identifier (UMI). P value was calculated by binomial test based differentially expression analysis. P value < 0.05 and the fold change > or equal 1.2 were considered as significant.

**Supplemental Figure. E5. FOXF1-binding regions in promoters of endothelial genes identified by ChIPseq.** Schematic of FOXF1-binding regions in promoters of *Dusp6*, *Mapk3*, *Psm6*, *Ahnak*, *Cav1*, *Jup* and *Sdcbp*. ChIPseq was performed using mouse fetal lung endothelial MFLM-91U cell line. H3K4me3 methylation marks are shown for the same promoter regions. Regions of significant FOXF1 binding to chromatin are shown by star. Transcriptional start sites and direction of translation are shown with arrows.

**Supplemental Figure. E6. FOXF1 binds to bidirectional promoter of *Foxf1* and *Fendrr*.** Schematic of FOXF1-binding regions in *Foxf1/ Fendrr* bidirectional promoter. ChIPseq was performed using mouse fetal lung endothelial MFLM-91U cell line. Regions of significant FOXF1 binding to chromatin that contain H3K4me1 and H3K4me3 methylation marks are shown by black boxes. Transcriptional start sites and direction of translation are shown with arrows.

**Supplemental Figure. E7. FACS analysis shows the presence of FOXF1 protein in lung endothelial cells.** Cell suspension from collagenase-digested P7 mouse lungs was used for

intracellular staining with FOXF1 Ab. FOXF1 protein is detected in lung ECs (PECAM-1<sup>+</sup> CD45<sup>-</sup>) but not in epithelial cells (EpCAM<sup>+</sup> CD45<sup>-</sup>). Isotype control Ab is shown with dotted line.

**Supplemental Figure. E8. Neonatal hyperoxia causes alveolar simplification and disrupts lung function.** (A) Schematic representation of hyperoxia (HO) treatment of wild type (WT) newborn mice. Control mice were exposed to room air (RA). (B) H&E staining shows alveolar simplification in lungs of HO-treated mice at P30. Percentages of airspace were calculated using 10 random lung fields and n=5 mice per group. Scale bar is 50 $\mu$ m. (C) FlexiVent was used to assess lung function in 7-9 mice in each group. Measurements were carried out at P60. p<0.05 is \*, p<0.01 is \*\*, p<0.001 is \*\*\* and p<0.0001 is \*\*\*\*.

**Supplemental Figure. E9. Neonatal hyperoxia decreases the number of endothelial and epithelial cells in the lung.** (A) FACS analysis of collagenase-digested P30 mouse lungs shows decreased numbers of endothelial (EC, PECAM-1<sup>+</sup>CD45<sup>-</sup>) and epithelial cells (EpC, EpCAM<sup>+</sup>CD45<sup>-</sup>) after hyperoxia (HO) compared to room air exposure (RA). (B) FACS data are presented as numbers of EC, EpC and hematopoietic cells (HC, CD45<sup>+</sup>) in 10<sup>6</sup> total lung cells (n=5 mice in each group). p<0.01 is \*\*.

**Supplemental Figure. E10. Deletion of *Foxf1* reduces *c-KIT* in pulmonary endothelial cells.** (A-B) FACS analysis of collagenase-digested P7 mouse lungs shows decreased expression of cell surface and intracellular c-KIT proteins in endothelial cells from tamoxifen-treated *PDGFb-Cre/Foxf1*<sup>-/-</sup> mice. Cell surface and intracellular c-KIT was distinguished using Abs recognizing cell surface or intracellular regions of c-KIT receptor. Percentages of cells are presented in panel B (n=5 mice per group). (C) ChIPseq shows FOXF1-binding regions and histone methylation marks within the mouse *Kit* gene locus. Mouse fetal lung endothelial MFLM-91U cell line was

used for ChIPseq. Regions of significant FOXF1 binding to chromatin are shown by black boxes. Transcriptional start sites and direction of translation are shown with an arrow. **(D-E)** FACS shows a significant decrease in c-KIT<sup>+</sup> ECs in lungs of tamoxifen-treated *PDGFb-Cre/Foxf1<sup>+/-</sup>* and *PDGFb-Cre/Foxf1<sup>-/-</sup>* mice at P7 (n=4-6 mice in each group). p<0.05 is \*, p<0.01 is \*\*.

**Supplemental Figure. E11. Deletion of *Foxf1* increases cell surface expression of SCF in pulmonary endothelial cells.** **(A-B)** FACS analysis of collagenase-digested mouse lungs shows increased expression of SCF in FOXF1-negative endothelial cells using dot plots and histograms. Tamoxifen-treated *PDGFb-Cre/Foxf1<sup>-/-</sup>* and control *Foxf1<sup>fl/fl</sup>* lungs were harvested at P7. **(C)** Deletion of *Foxf1* increases SCF. Percentages of ECs expressing FOXF1 or SCF were calculated using n=4-5 mice in each group. p<0.01 is \*\*.

**Supplemental Figure E12. *Foxf1* haploinsufficiency increases endothelial cell death in the neonatal lung.** FACS analysis shows a significant increase in cell death (Annexin V<sup>+</sup> 7AAD<sup>+</sup>) among endothelial cell population (PECAM-1<sup>+</sup>CD45<sup>-</sup>) in *Foxf1<sup>+/-</sup>* lungs. Lungs of *Foxf1<sup>+/-</sup>* and WT littermates were harvested at P7 (n=5 mice in each group). p<0.01 is \*\*.

**Supplemental Figure E13. Deletion of *Foxf1* from endothelial cells decreases PECAM-1 staining in the neonatal lung.** Immunostaining for PECAM-1 and TTF1 (NKX2.1) shows decreased PECAM-1 staining in tamoxifen-treated *PDGFb-Cre/Foxf1<sup>-/-</sup>* lungs. DAPI was used to stain cell nuclei. Sections were prepared from P7 lungs. Abbreviations: RA, room air; HO, hyperoxia. Scale bar is 20µm.

**Supplemental Figure E14. Deletion of *c-Kit* decreases percentages of endothelial and epithelial cells in the neonatal lung.** **(A)** Immunostaining for c-KIT, PECAM-1 and NKX2.1



shows the absence of c-KIT-positive endothelial cells in *Kit<sup>w-sh</sup>* lungs. Sections were prepared from P7 lungs. Abbreviations: RA, room air; HO, hyperoxia. Scale bar is 20 $\mu$ m. **(B)** FACS analysis shows a significant decrease in endothelial (PECAM-1<sup>+</sup>CD45<sup>-</sup>EpCAM<sup>-</sup>) and epithelial cells (EpCAM<sup>+</sup>CD45<sup>-</sup>PECAM-1<sup>-</sup>) in lungs of *Kit<sup>w-sh</sup>* mice. Lungs were harvested at P7 (n=4-5 mice in each group). p<0.01 is \*\*.

**Supplemental Figure E15. Adoptive transfer of c-KIT<sup>+</sup> ECs increases capillary density and protects *Foxf1<sup>+/-</sup>* lungs from alveolar simplification.** Cells were FACS-sorted from P3 lungs of *Rosa/tdTomato* donor mice and injected i.v. into hyperoxia-treated *Foxf1<sup>+/-</sup>* recipient mice at P3. Lungs were harvested at P14. **(A)** H&E staining shows diminished alveolarization in *Foxf1<sup>+/-</sup>* lungs, which was improved after adoptive transfer of donor c-KIT<sup>+</sup> ECs (top panels). Immunostaining for endomucin (green) and NKX2.1 (red) shows the loss of endomucin in alveolar septa of hyperoxia-treated *Foxf1<sup>+/-</sup>* mice (arrowheads). DAPI was used to stain cell nuclei. Endomucin staining was improved after adoptive transfer of donor c-KIT<sup>+</sup> ECs. Magnification: top panels, x200; middle panels, x400, bottom panels, x1500. **(B)** Quantification of endomucin staining was performed using ImageJ software in 10 random images from 5 mouse lungs in each group, p<0.05 is \*, p<0.01 is \*\*.

**Supplemental Figure E16. FACS-sorted c-KIT<sup>+</sup> ECs do not integrate into endothelium of large pulmonary arteries, vein and lymphatic vessels.** **(A)** FACS analysis shows the absence of *tdTomato<sup>+</sup>* cells among epithelial (EpCAM<sup>+</sup> PECAM-1<sup>-</sup> CD45<sup>-</sup>) and stromal (EpCAM<sup>-</sup> PECAM-1<sup>-</sup> CD45<sup>-</sup>) cell populations in *Foxf1<sup>+/-</sup>* recipient lungs seven days after adoptive transfer (n= 5 mice). **(B)** Cells were FACS-sorted from P3 lungs of *Rosa/tdTomato* donor mice and injected i.v. into *Foxf1<sup>+/-</sup>* P3 recipient mice that were exposed to hyperoxia from P1 to P3. Lungs were harvested at P14 and used for immunostaining for PECAM1,  $\alpha$ SMA and LYVE-1. Slides were

counterstained with DAPI. *tdTomato*-positive cells were not found in endothelium of large pulmonary arteries, vein and lymphatic vessels. Abbreviations: A, artery; V, vein; Ly, lymphatic vessel; EpC, epithelial cells; StC, stromal cells. Magnification is x1000.

**Supplemental Figure. E17. Histological assessment of lung and heart structure after 3-day neonatal hyperoxia.** H&E staining shows that 3-day hyperoxia exposure (P1-P3) does not lead to right ventricular hypertrophy (A) or obvious remodeling of pulmonary arteries (B) but causes alveolar simplification(C). Donor ECs were injected i.v. after hyperoxia exposure. Lungs were harvested at P30. Peripheral pulmonary blood vessels are shown with green arrowheads and inserts. Abbreviations: A, artery; Br, bronchiole; RV, right ventricle; LV, left ventricle; V, blood vessel. Magnification: A panels, x150; B panels, x400; C panels, x200 (inserts are x800).

**Supplemental Figure E18. Adoptive transfer of c-KIT<sup>+</sup> ECs increases capillary density and decreases alveolar simplification in hyperoxia-treated wild type mice.** Cells were FACS-sorted from lungs of *Rosa/tdTomato* donor mice and injected i.v. into hyperoxia-treated WT recipient mice. WT mice were exposed to HO between P1 and P3. **(A)** H&E staining shows diminished alveolarization in hyperoxia-treated P14 lungs, which was improved after adoptive transfer of donor c-KIT<sup>+</sup> ECs. Immunostaining for Endomucin (green) and NKX2.1 (red) shows the loss of Endomucin staining in hyperoxia-treated P14 lungs (arrowheads). DAPI was used to stain cell nuclei. Endomucin staining was increased after adoptive transfer of donor c-KIT<sup>+</sup> ECs. Magnification: top panels, x200; middle panels, x400, bottom panels, x1500. **(B)** Quantification of endomucin staining was performed using ImageJ software in 10 random images from 5 mouse lungs in each group. **(C)** Quantification of isolectin B4 staining shows that adoptive transfer of donor c-KIT<sup>+</sup> ECs increases alveolar capillary density after hyperoxia. P18 mice were i.v. injected with isolectin B4 and lungs were harvested two hours later. Perfused lung vasculature was imaged

using confocal microscopy. 10 random 3D images were used for quantification (n=3-5 mice in each group), p<0.05 is \*, p<0.01 is \*\*.

**Supplemental Figure E19. Adoptive transfer of c-KIT<sup>+</sup> ECs increases the complexity of alveolar capillary networks in hyperoxia-treated wild type mice.** Cells were FACS-sorted from lungs of P3 donor mice and injected i.v. into WT P3 recipient mice that were exposed to HO between P1 and P3. Immunostaining and confocal imaging for endomucin and NKX2.1 was performed at P14 (left panels). Confocal imaging for isolectin B4 was performed at P18 (right panels). Mice were i.v. injected with isolectin B4 2hr prior to the lung harvest. Isolectin B4 (green) shows perfused alveolar capillary networks. Adoptive transfer of c-KIT<sup>+</sup> ECs increases capillary density after hyperoxia. Scale bars are 50µm.

**Supplemental Figure E20. Confocal imaging of donor-derived cells in hyperoxia-treated recipient lungs.** c-KIT<sup>+</sup> ECs were FACS-sorted from P3 lungs of *Rosa/tdTomato* donor mice and injected i.v. into wild type P3 recipient mice that were exposed to hyperoxia between P1 and P3. At P18, mice were i.v. injected with isolectin B4 (green) and harvested two hours later. Perfused lung vasculature was imaged using confocal microscopy. Lungs of mice exposed to room air without cell transfer were used as controls for red autofluorescence. *tdTomato*-labeled cells are present in alveolar capillaries stained by Isolectin B4. Abbreviations: al, alveoli. Magnification: top and middle panels, x160; bottom panels, x640.

**Supplemental Figure E21. Identification of donor-derived endothelial cells in recipient lungs by FACS analysis. (A-B)** FACS analysis shows the presence of donor-derived *tdTomato*<sup>+</sup> endothelial cells at different time-points after adoptive transfer. c-KIT<sup>+</sup> ECs were FACS-sorted from P3 lungs of *Rosa/tdTomato* donor mice and transferred to WT P3 recipient mice. Recipient mice were exposed to hyperoxia between P1 and P3. Lung tissue was harvested at different time-

points after adoptive transfer and used for FACS analysis. Percentages of *tdTomato*<sup>+</sup> ECs cells are shown in B as mean  $\pm$  SD (n=3-5 mice per group for each time point). Abbreviations: EC, endothelial cells; EpC, epithelial cells. **(C-D)** FACS analysis shows increased cell proliferation in donor-derived *tdTomato*<sup>+</sup> ECs compared to recipient (*tdTomato*<sup>-</sup>) ECs. Lungs were harvested at P18. Hoechst 33342 was used to identify ECs undergoing S, G<sub>2</sub> and M phases of cell cycle (n=3 mice), p<0.05 is \*, p<0.01 is \*\*.

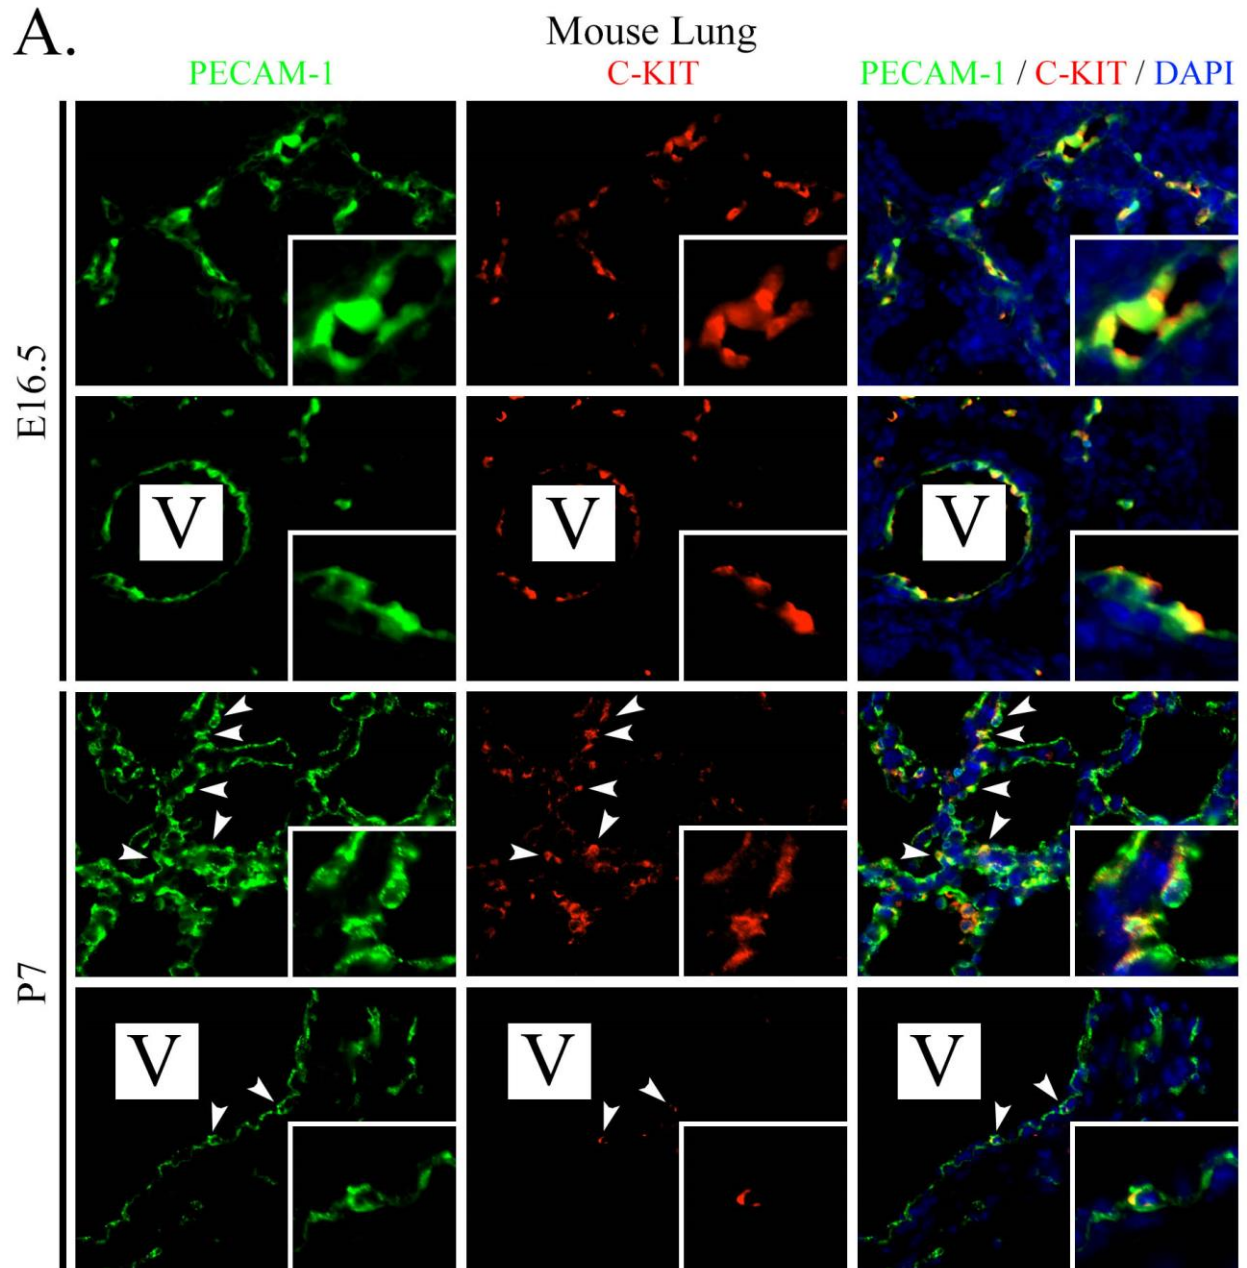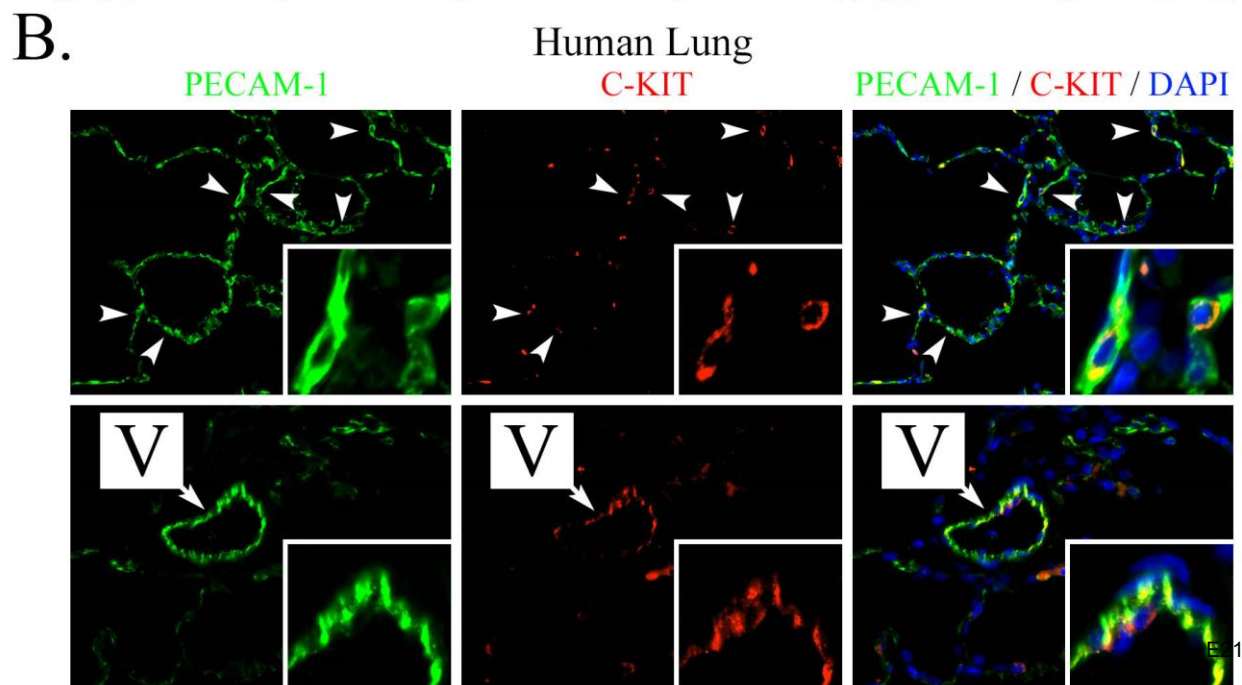

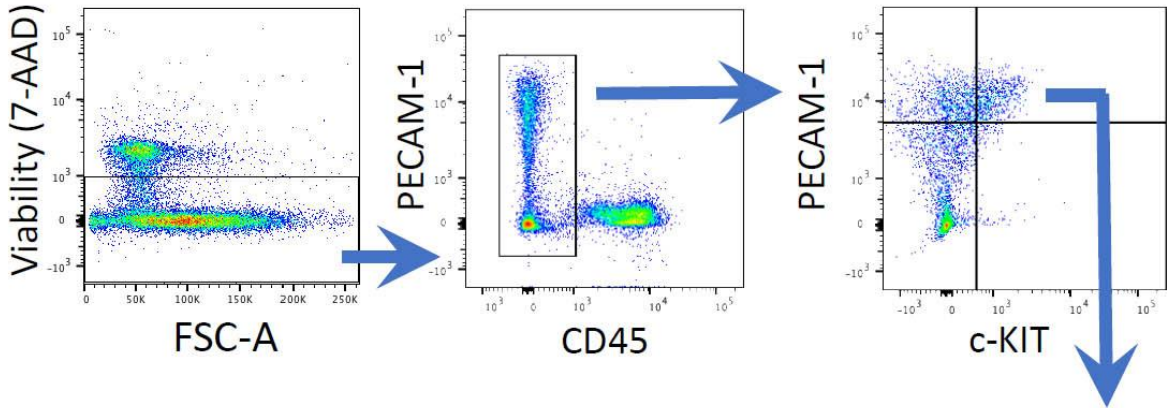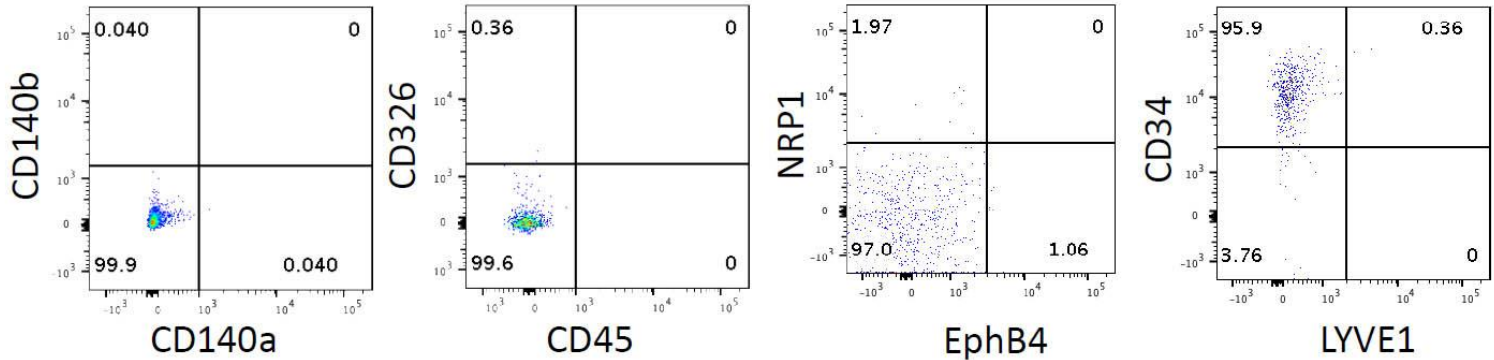

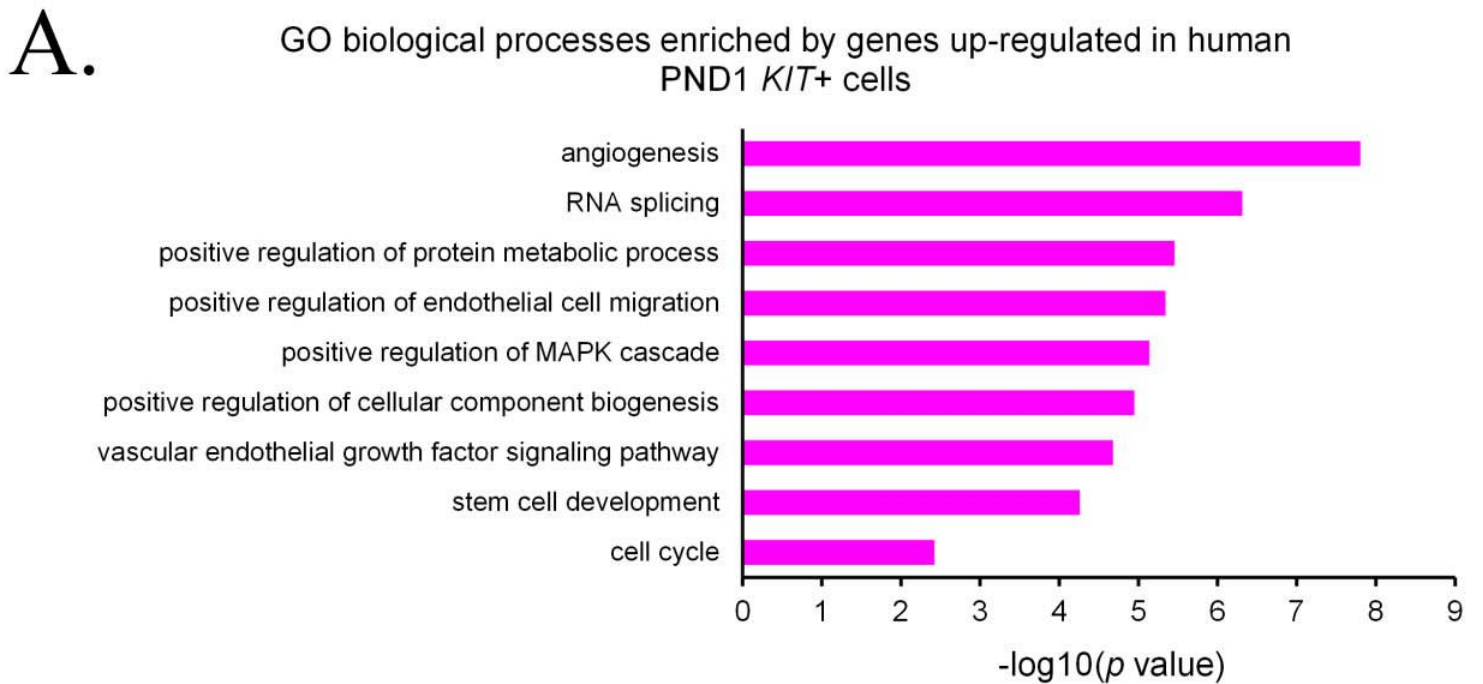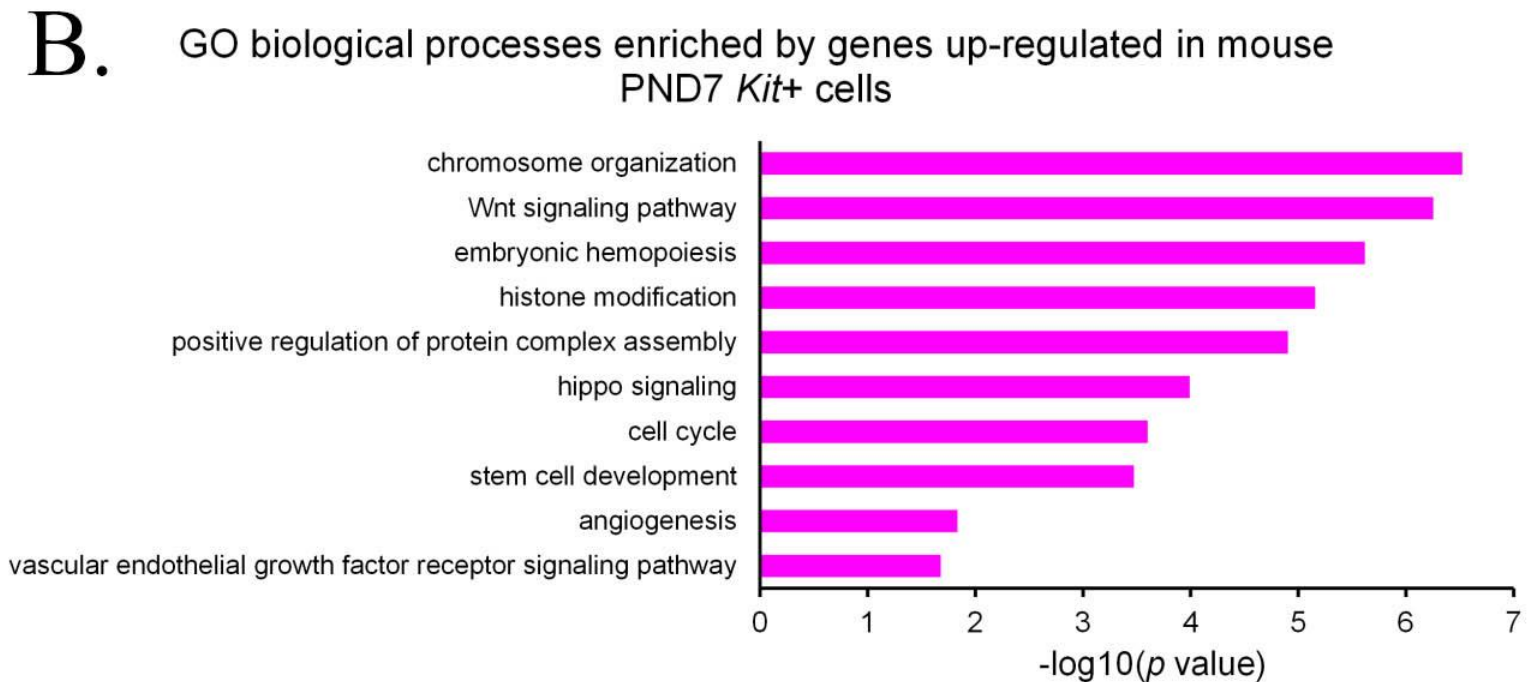

A.

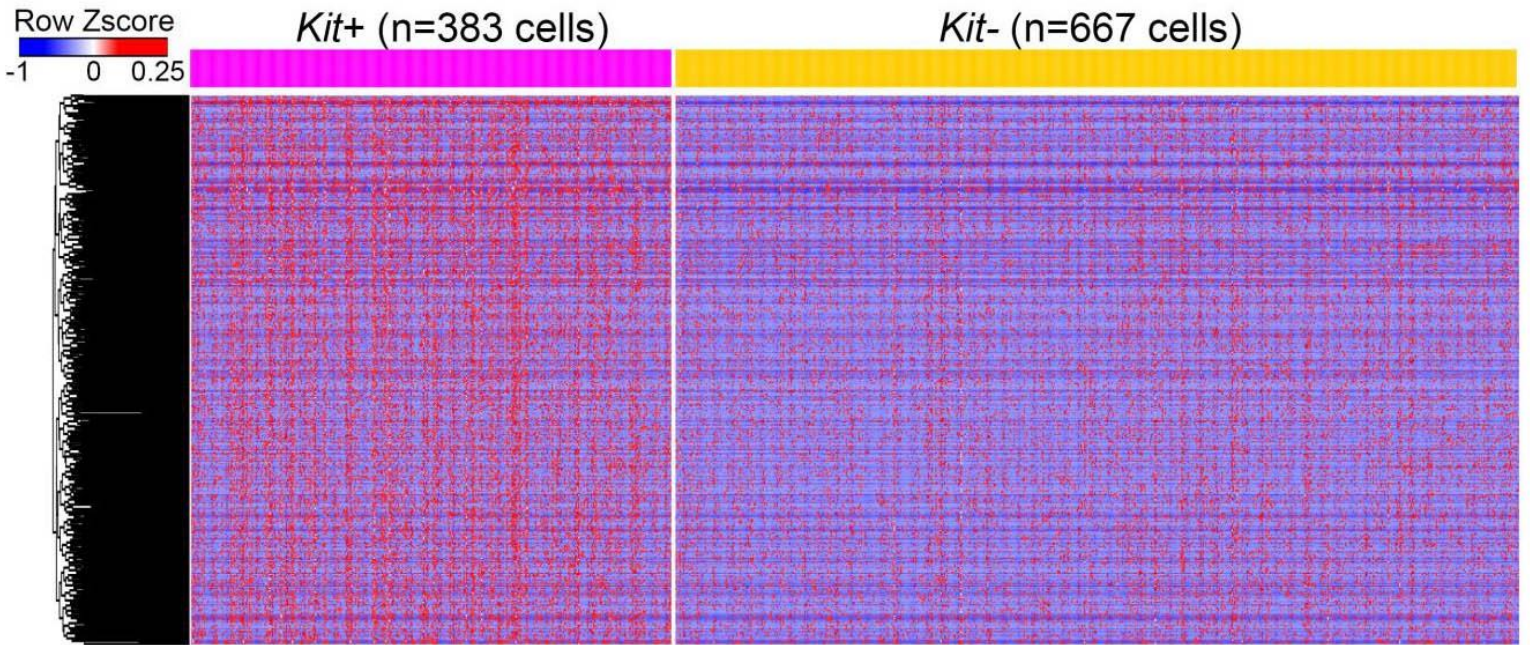

B.

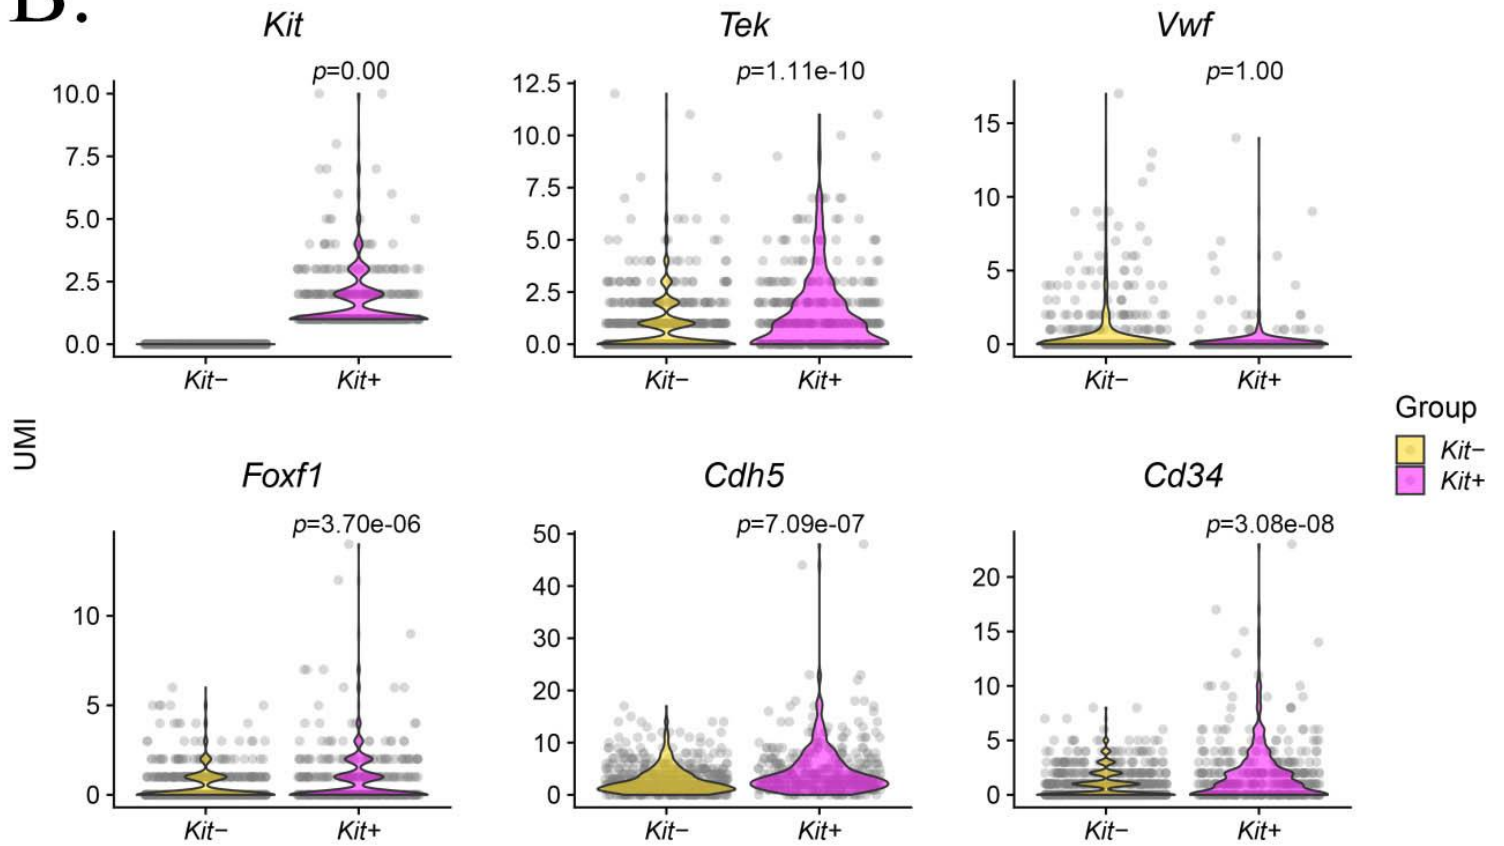



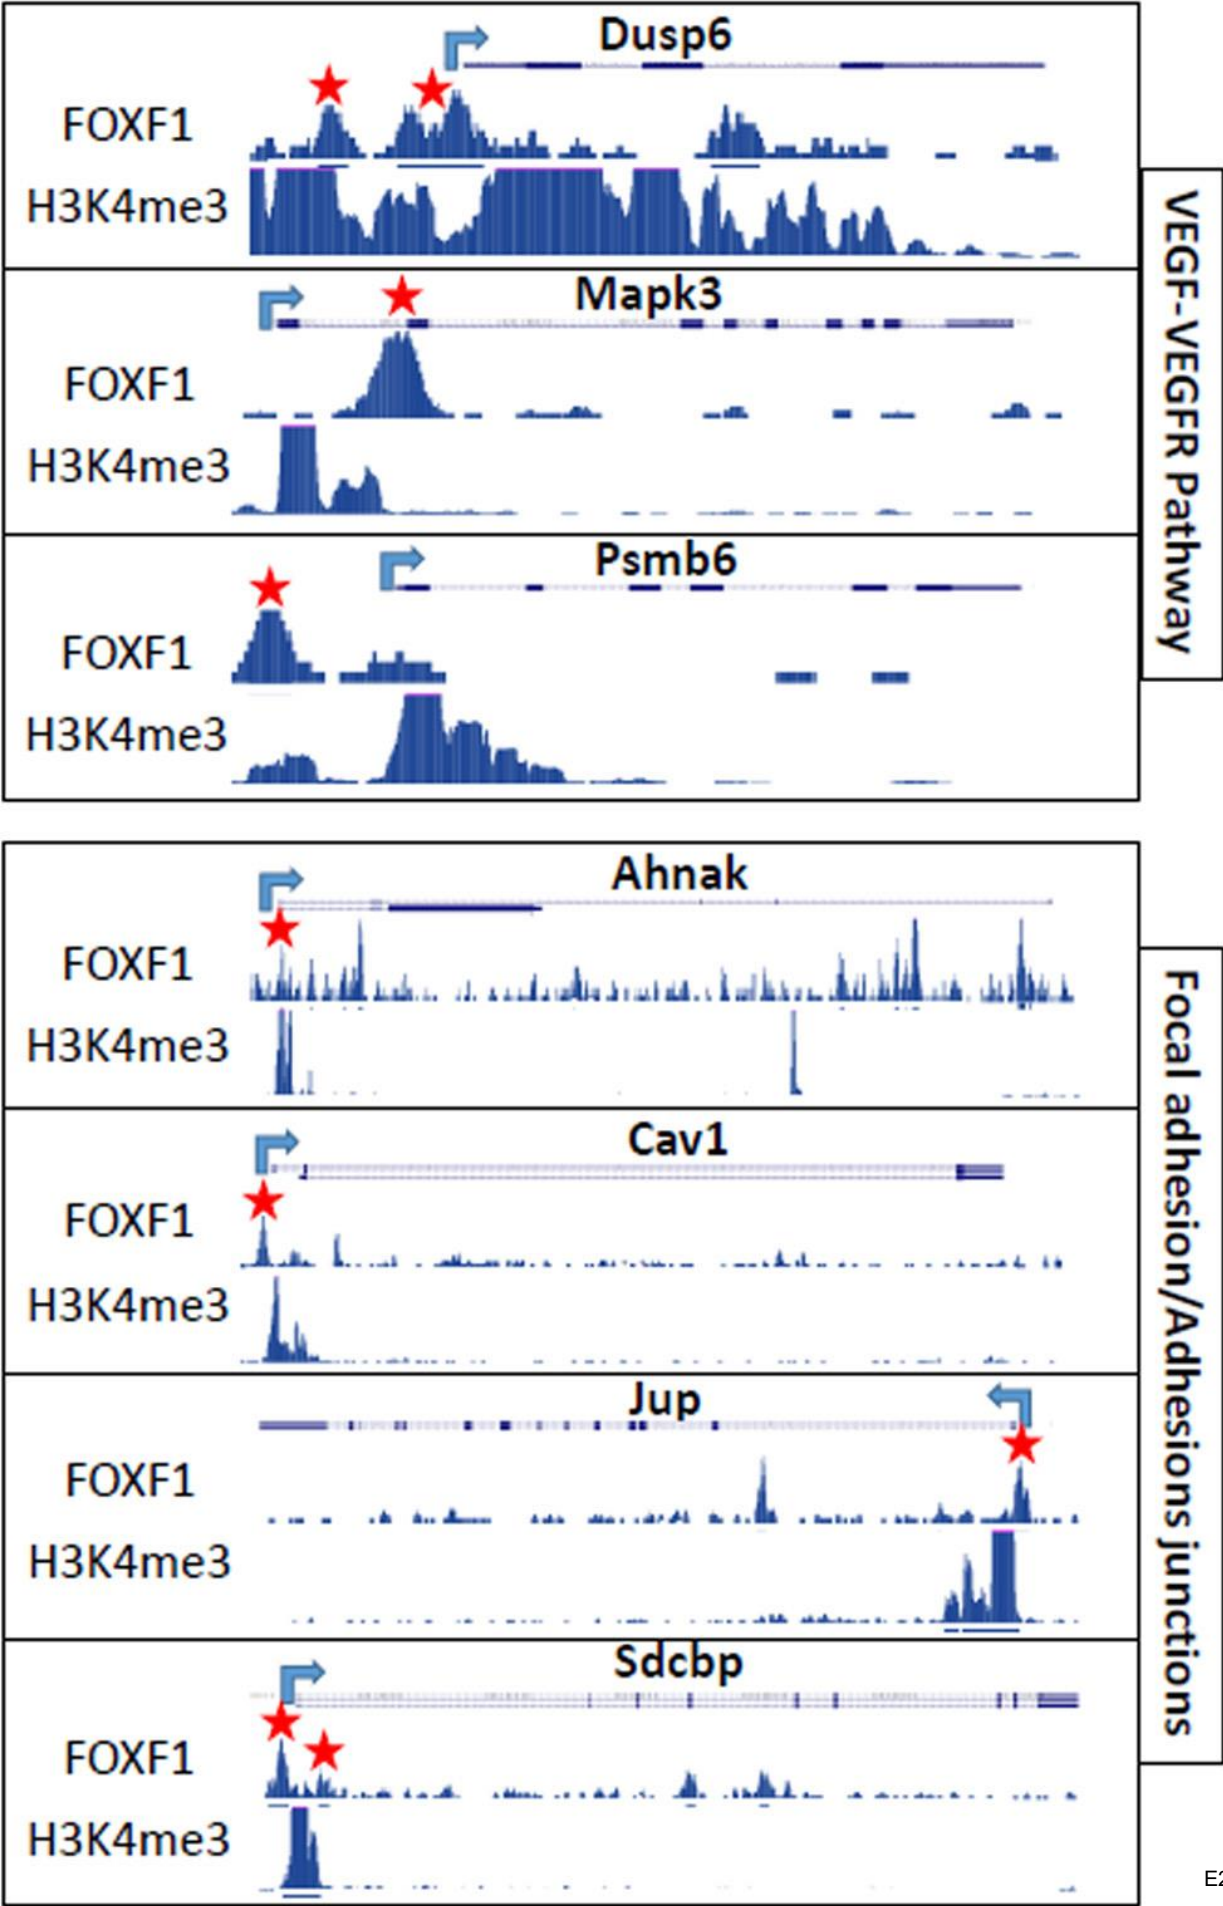

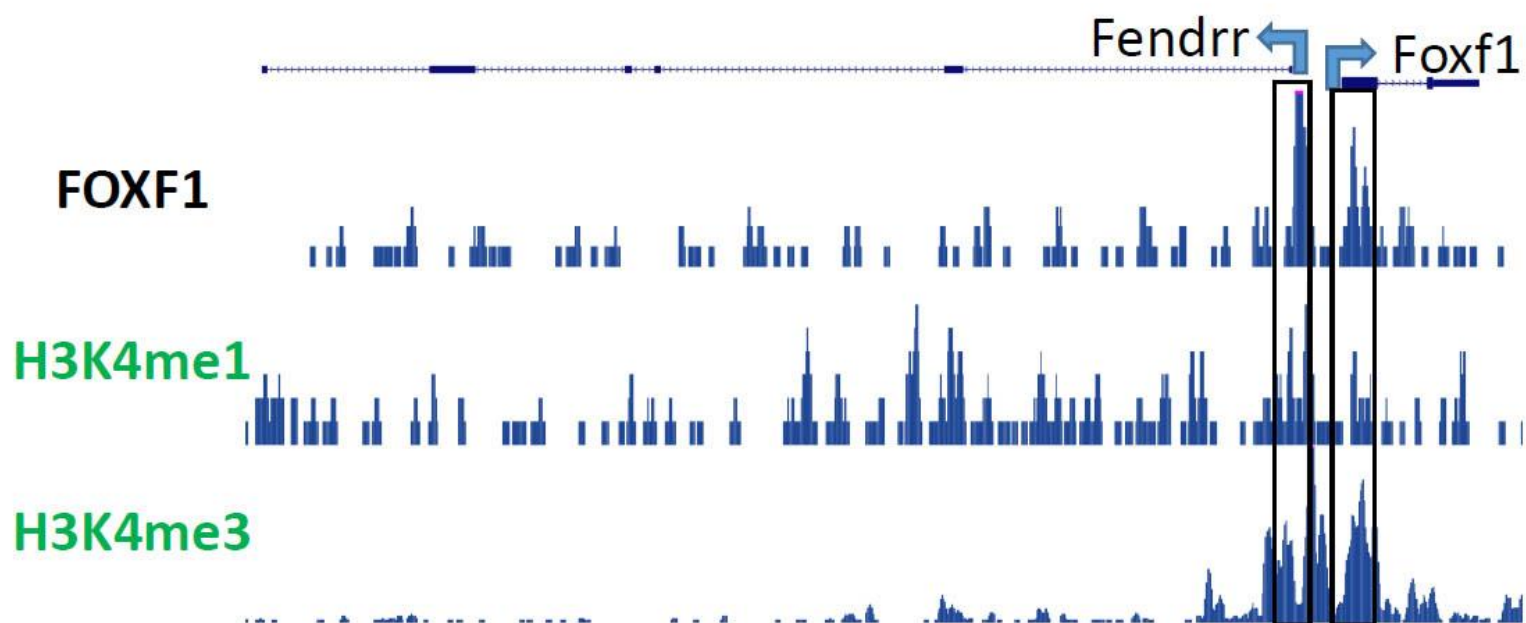

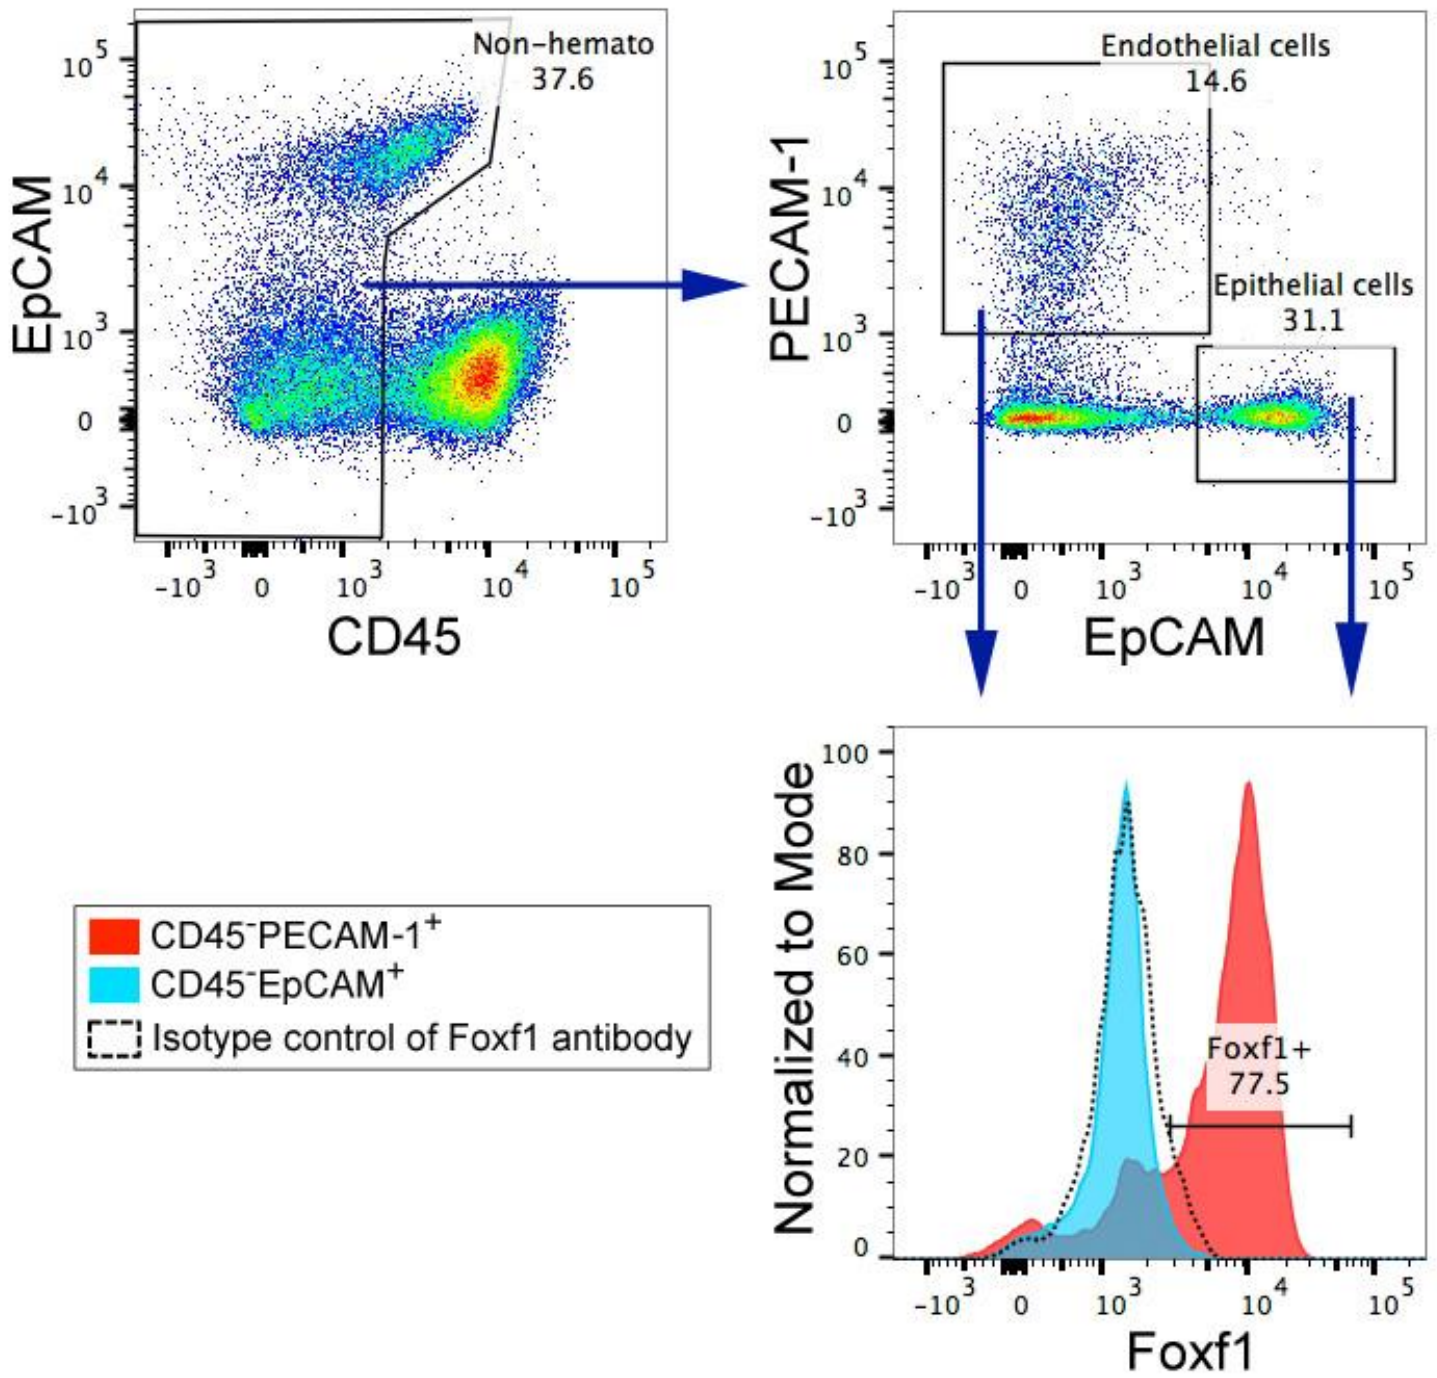

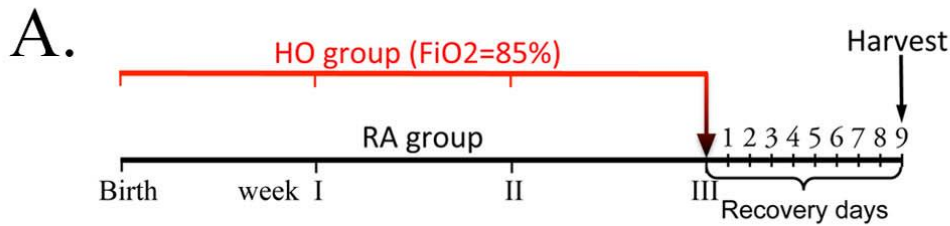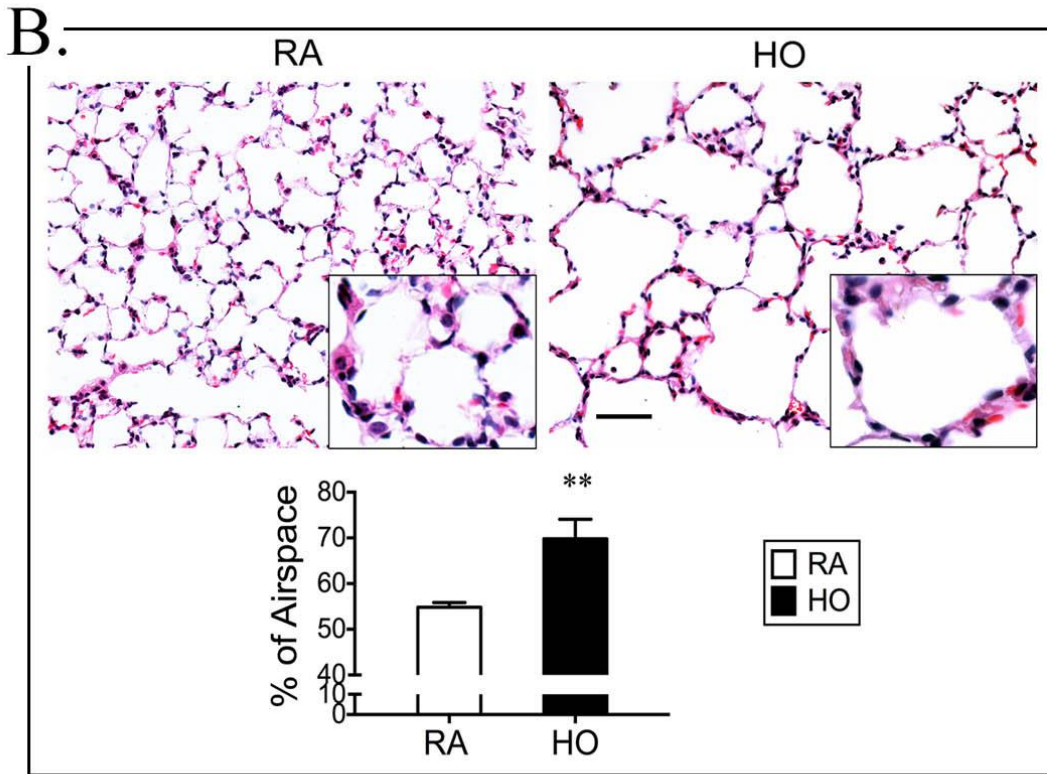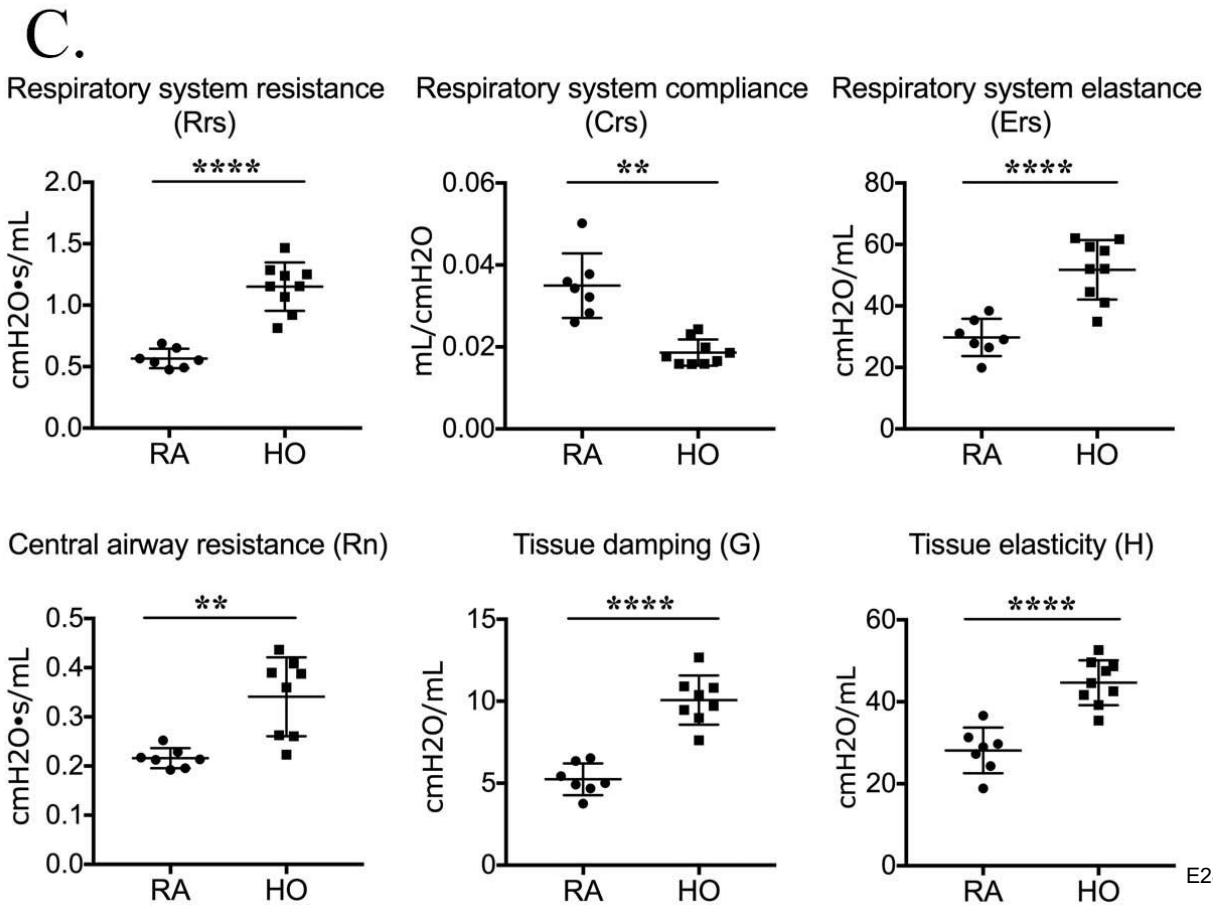

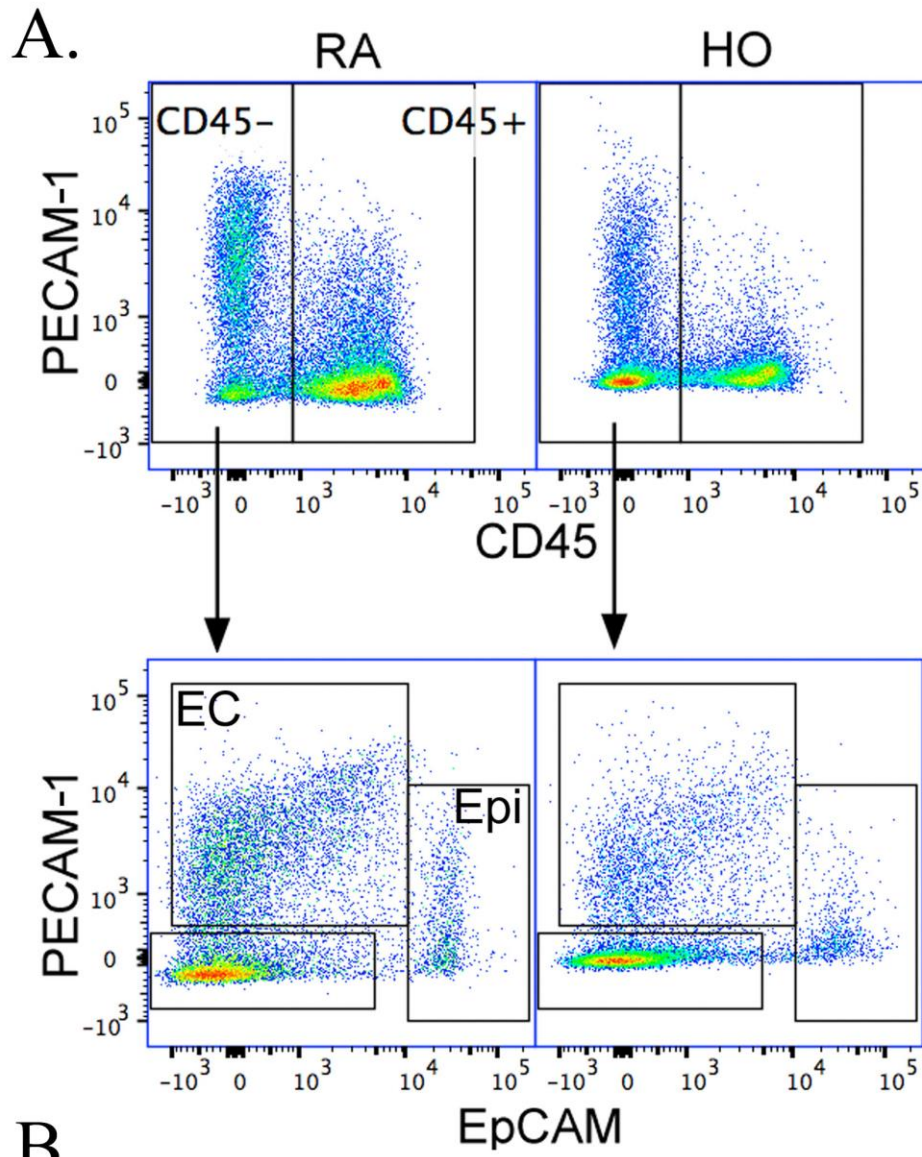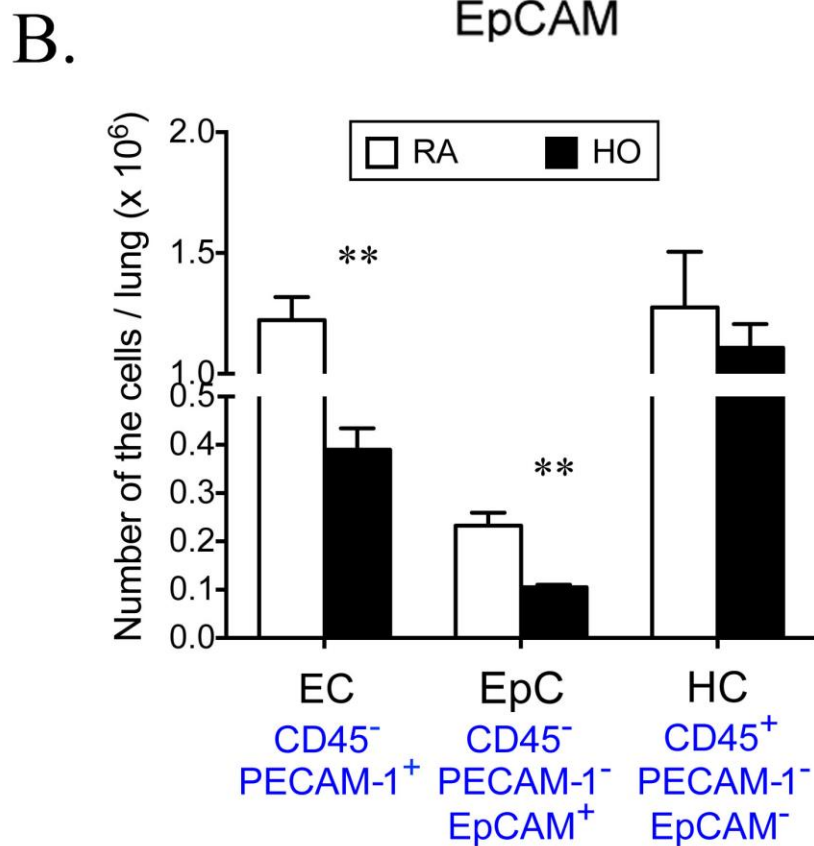

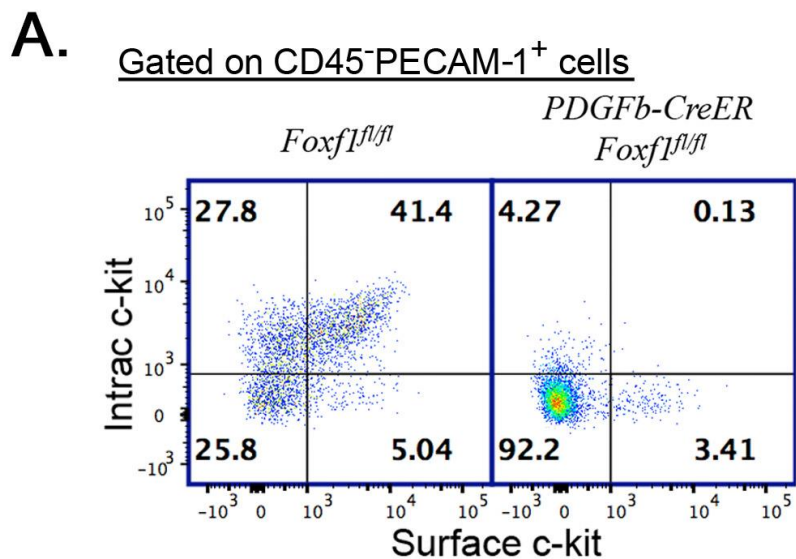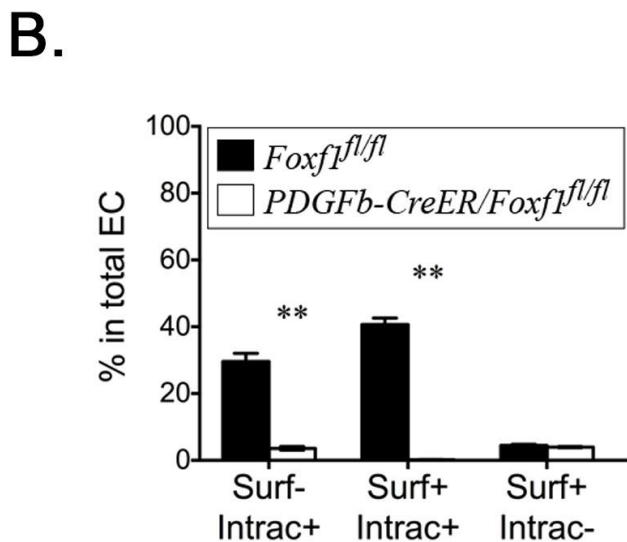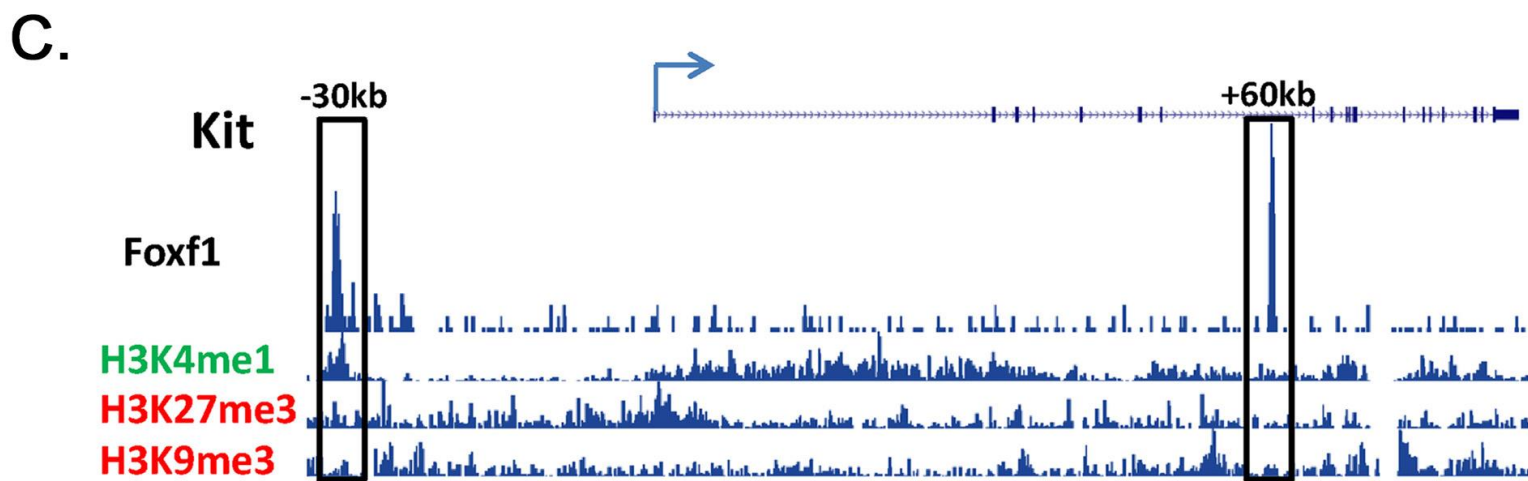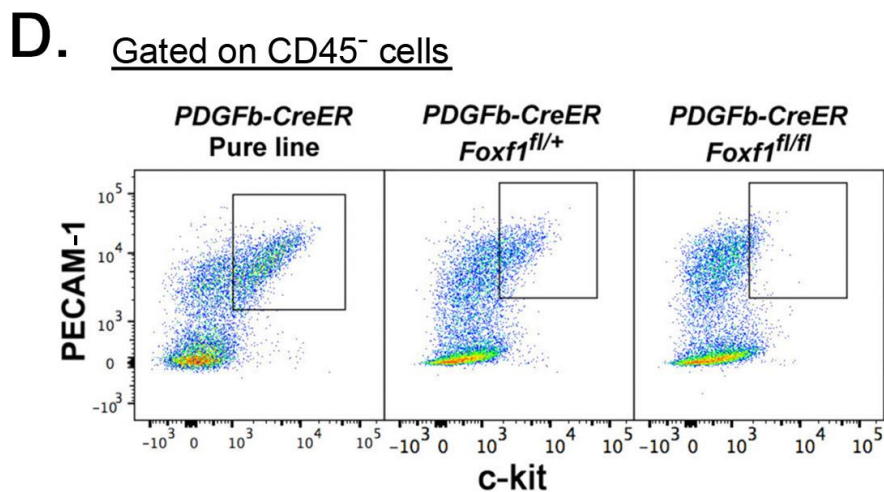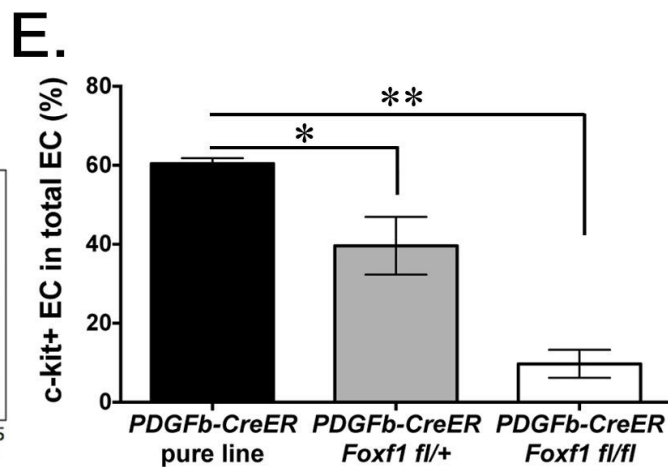

**A.**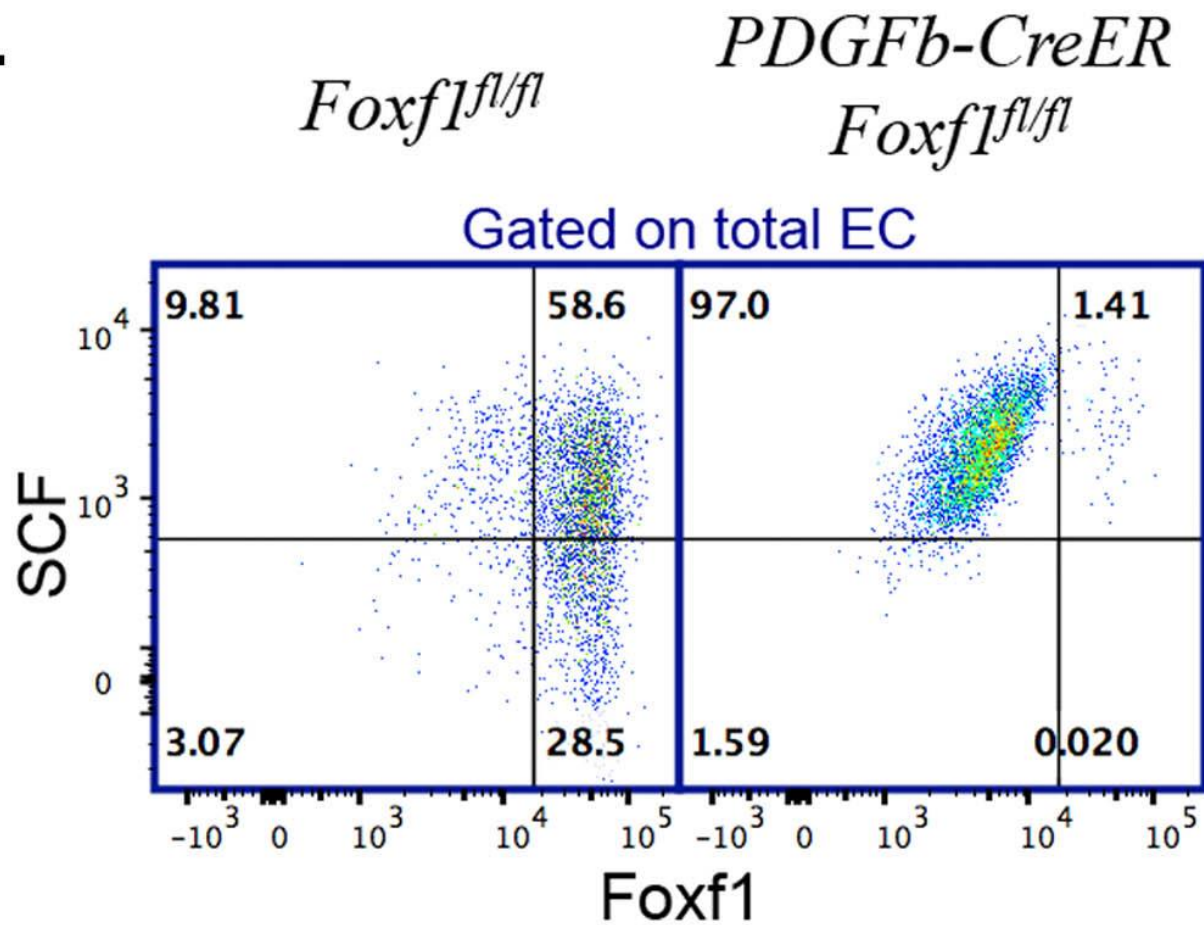**B.**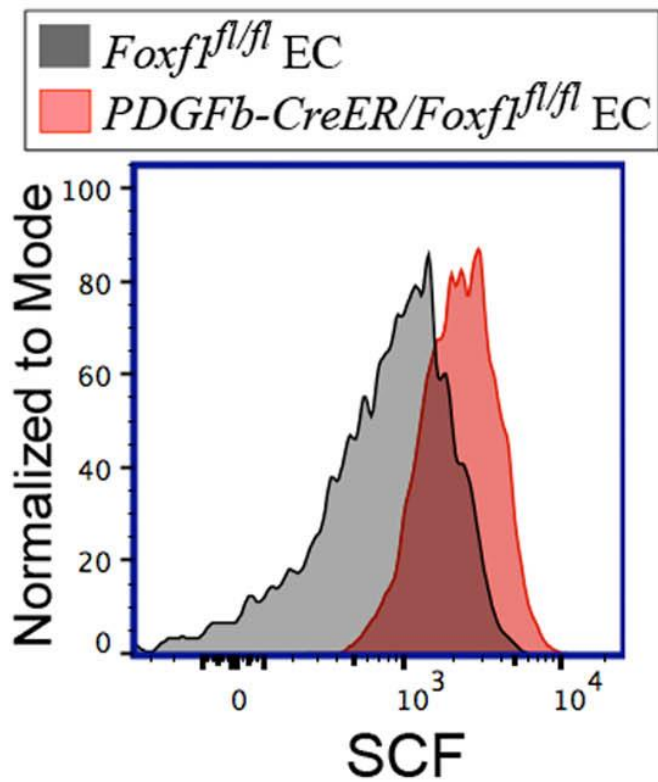**C.**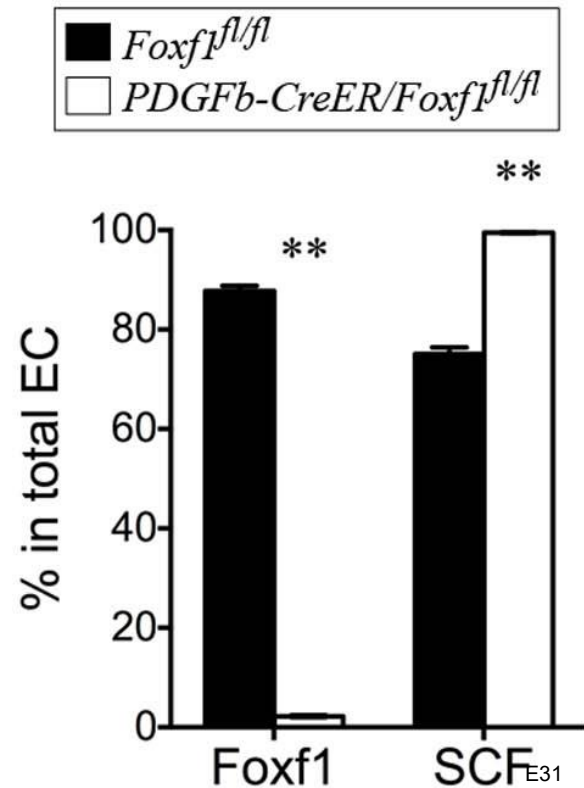

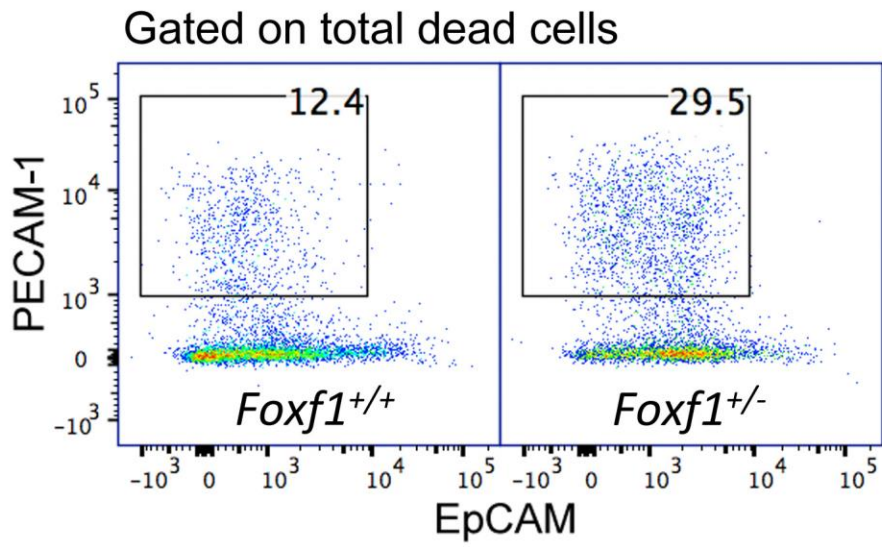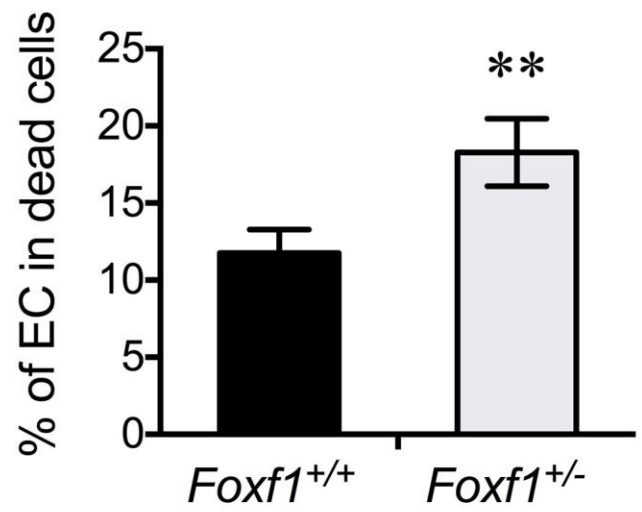



*Foxf1<sup>fl/fl</sup>*

*PDGFb-CreER / Foxf1<sup>fl/fl</sup>*

TTF1/PECAM-1/DAPI

RA

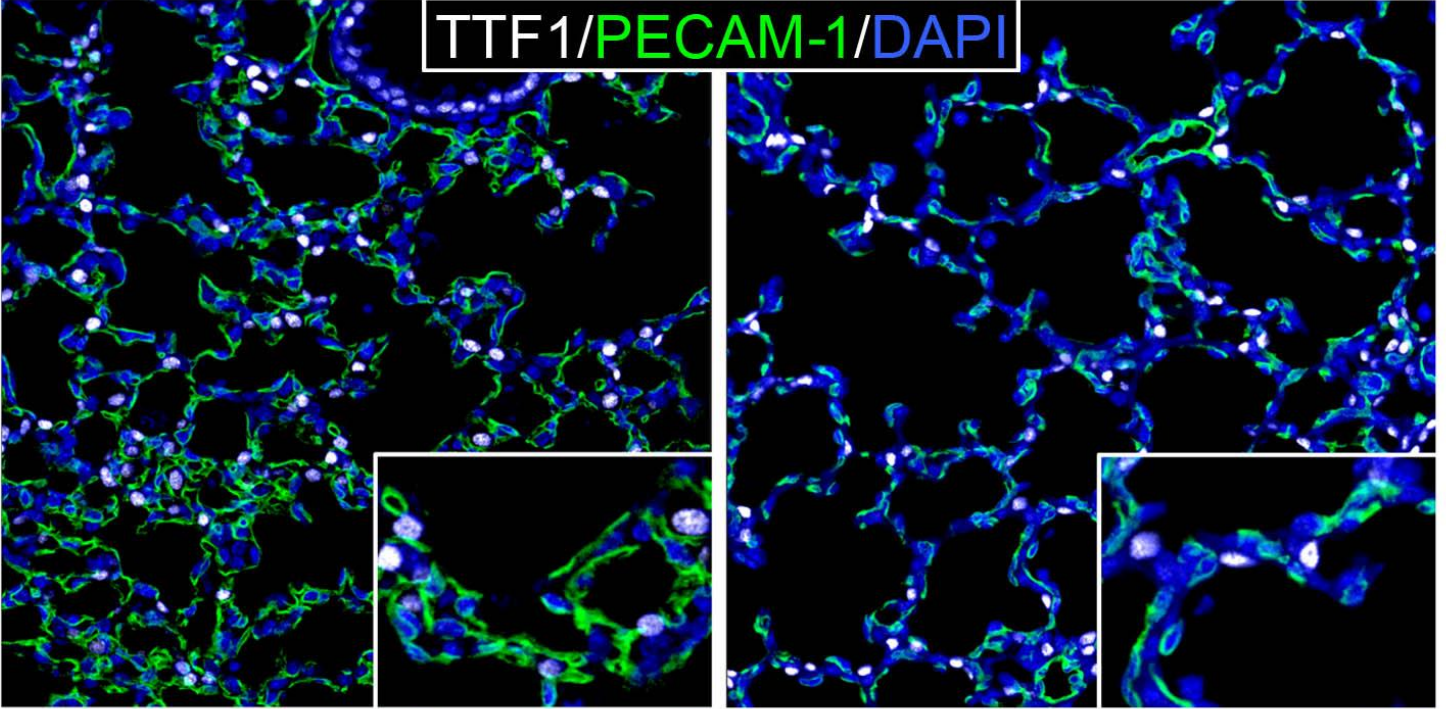

HO

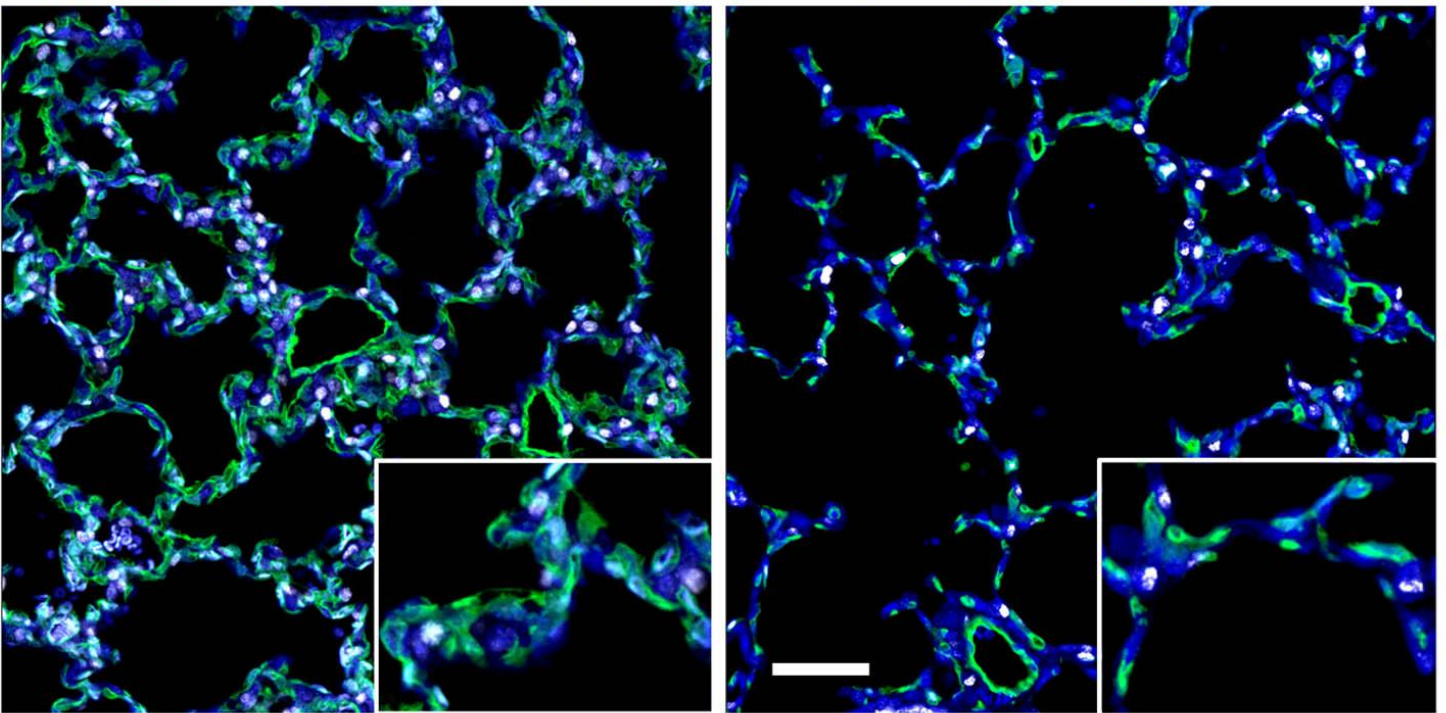

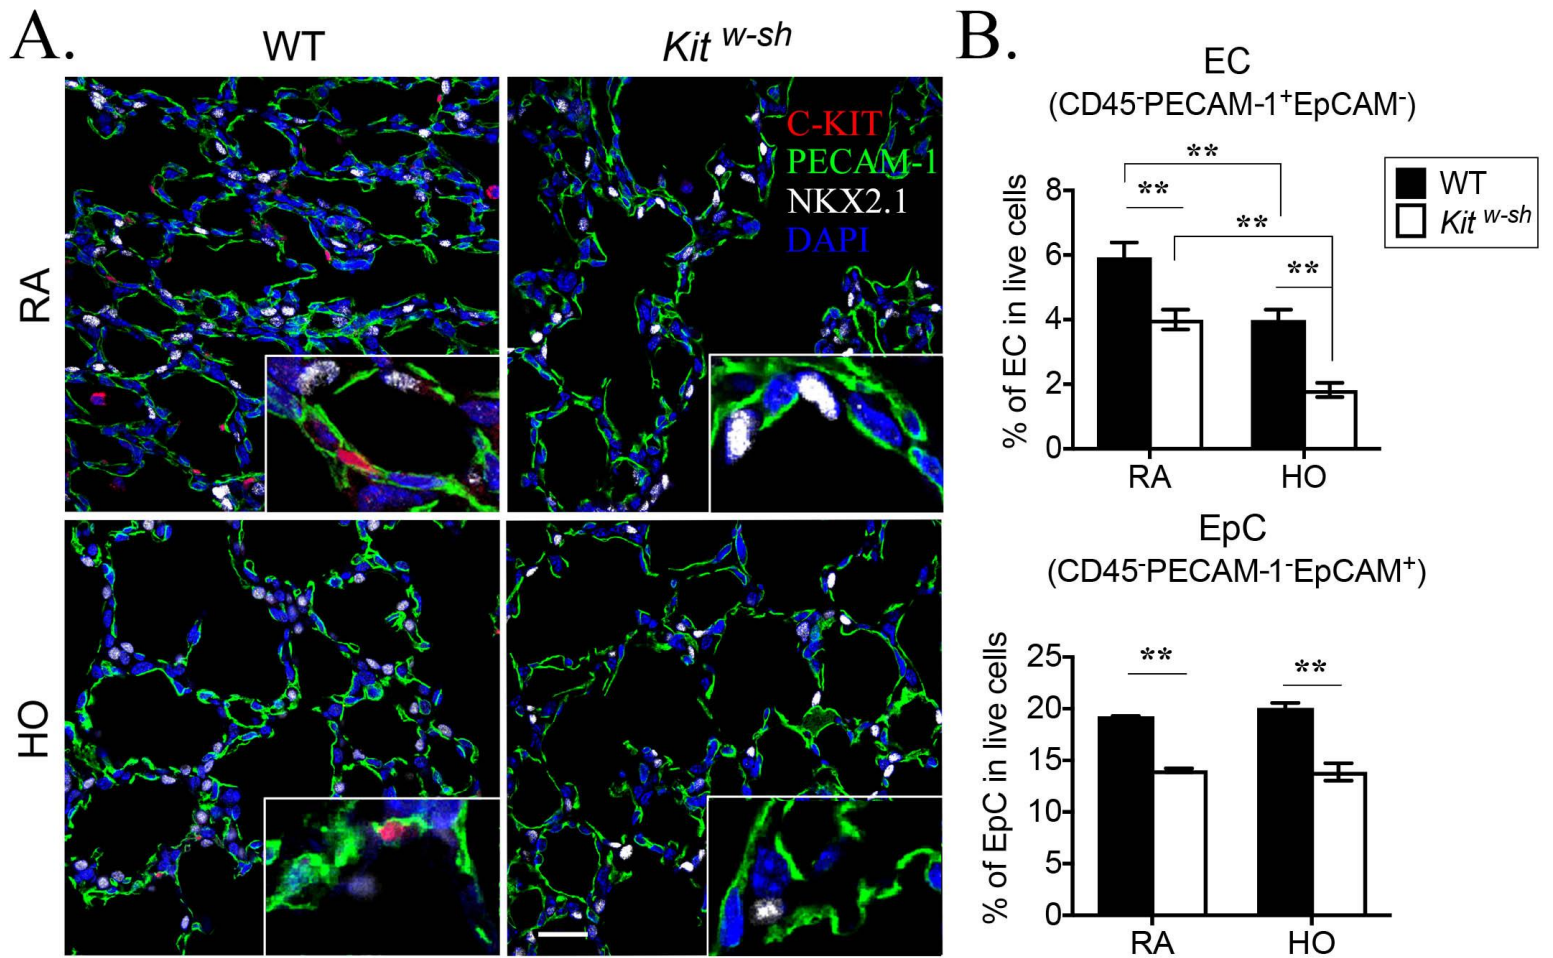

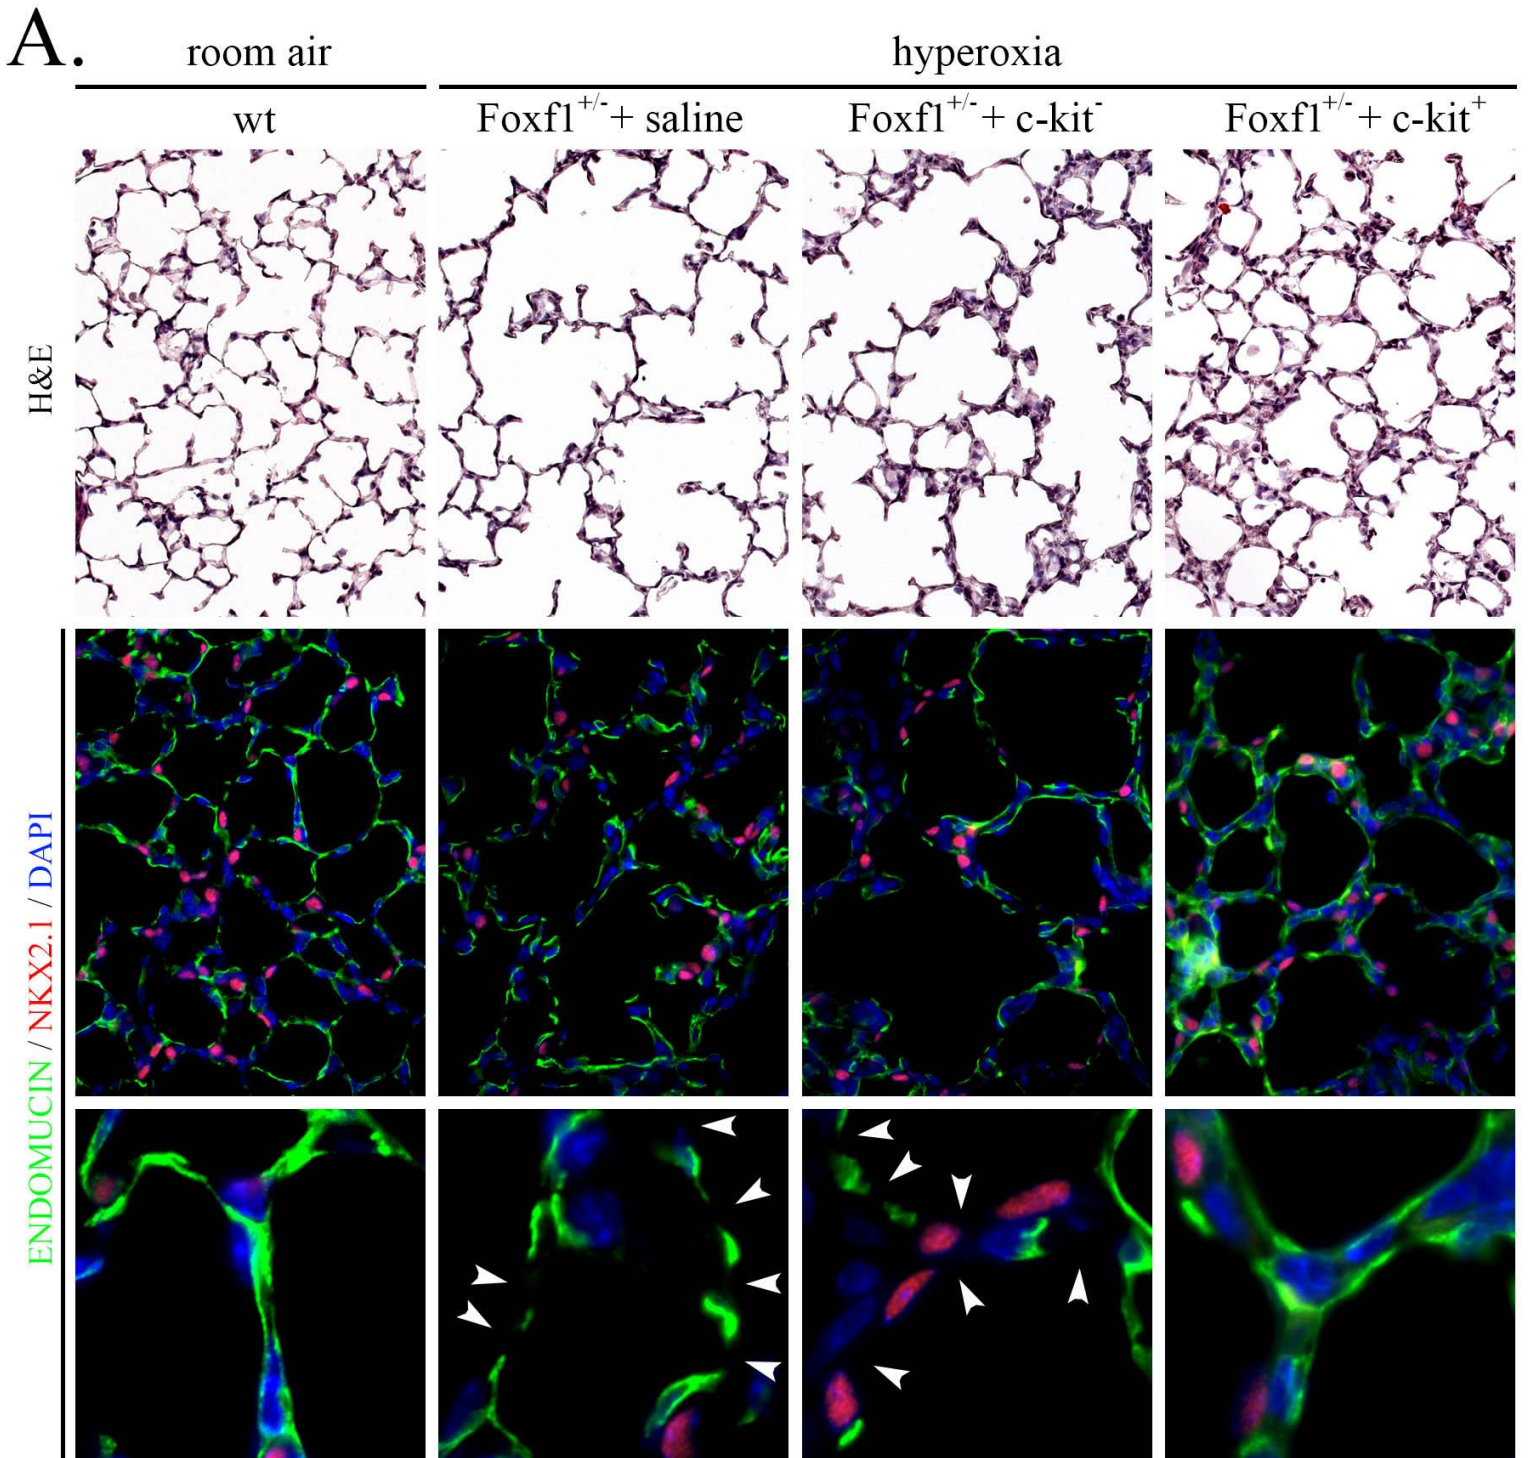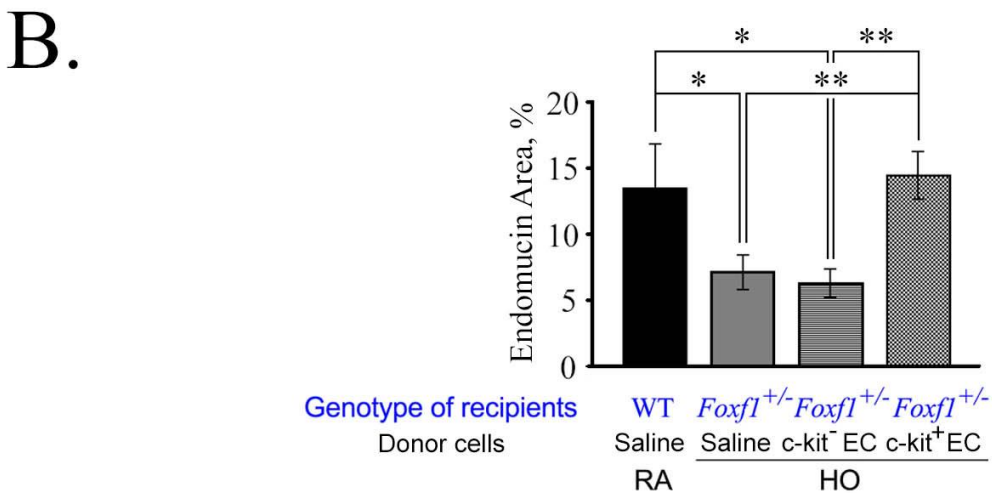

A.

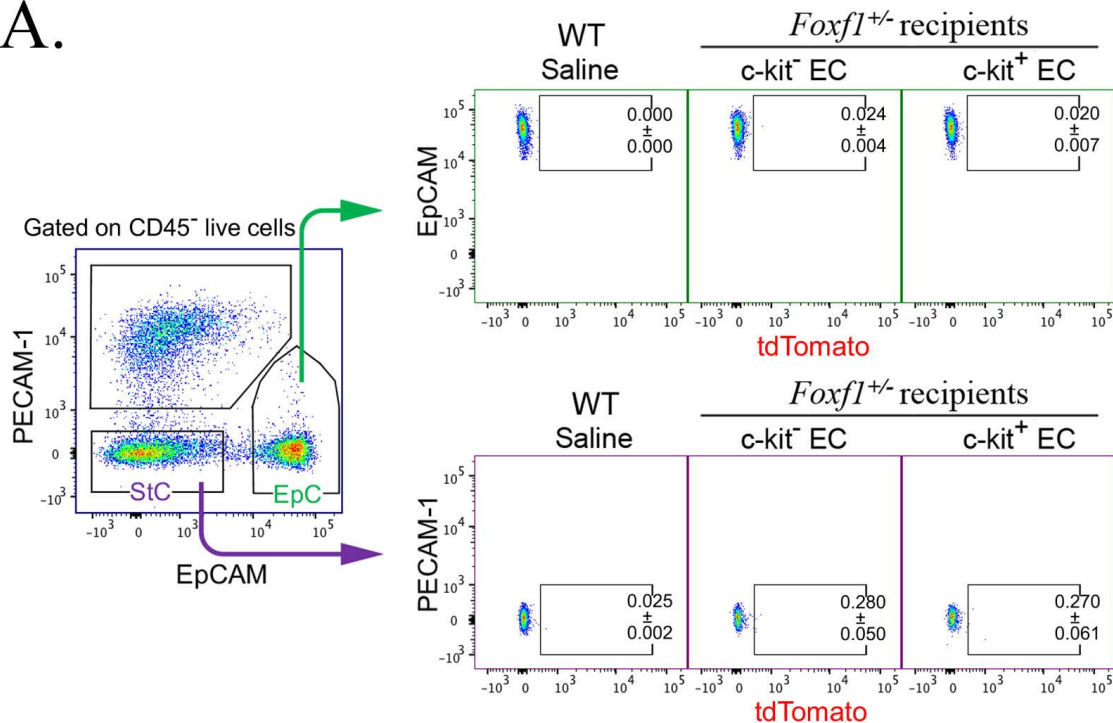

B.

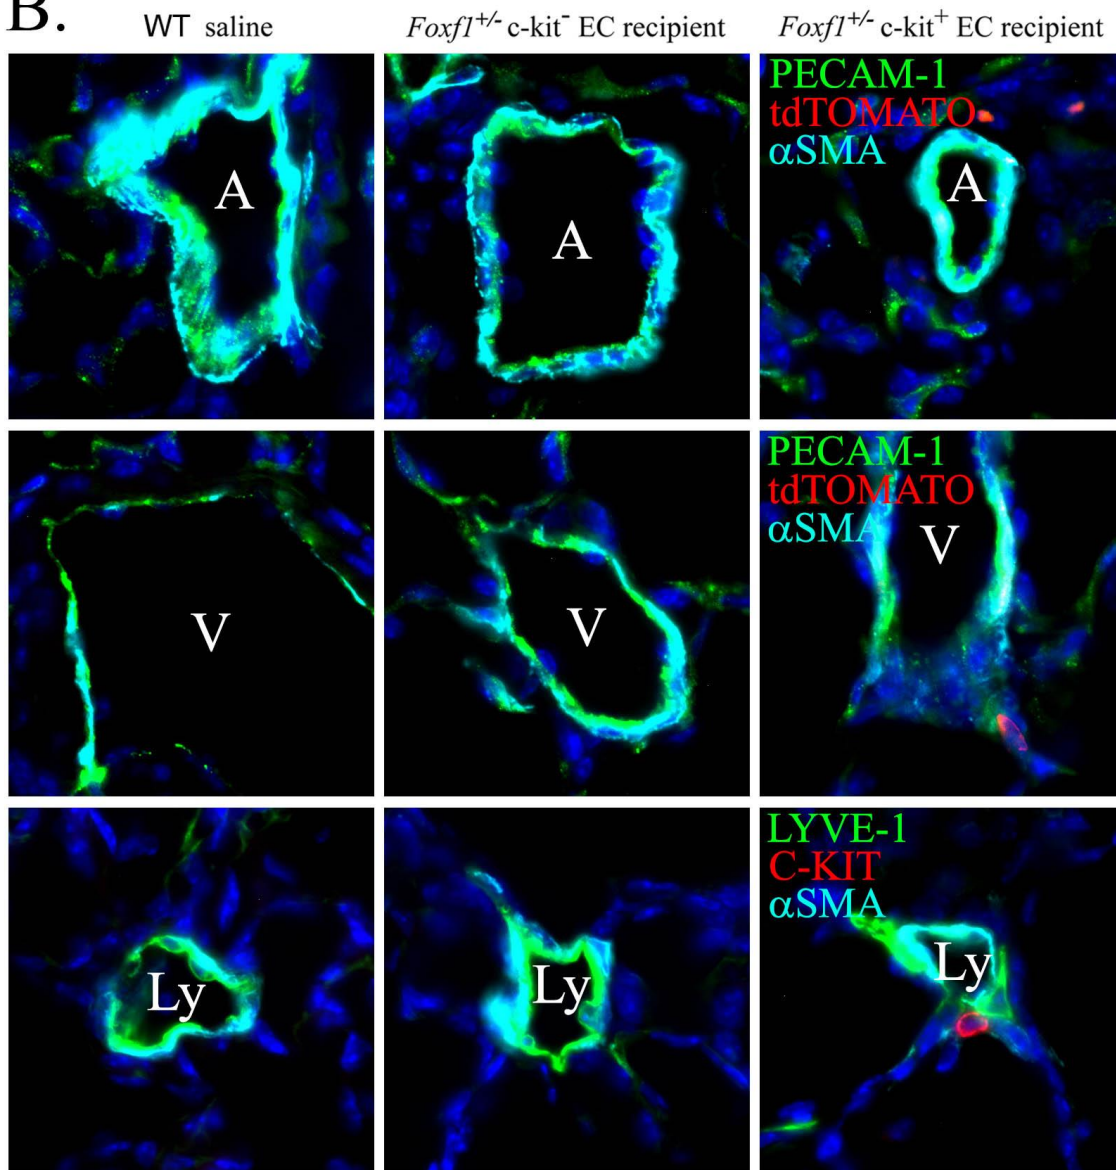

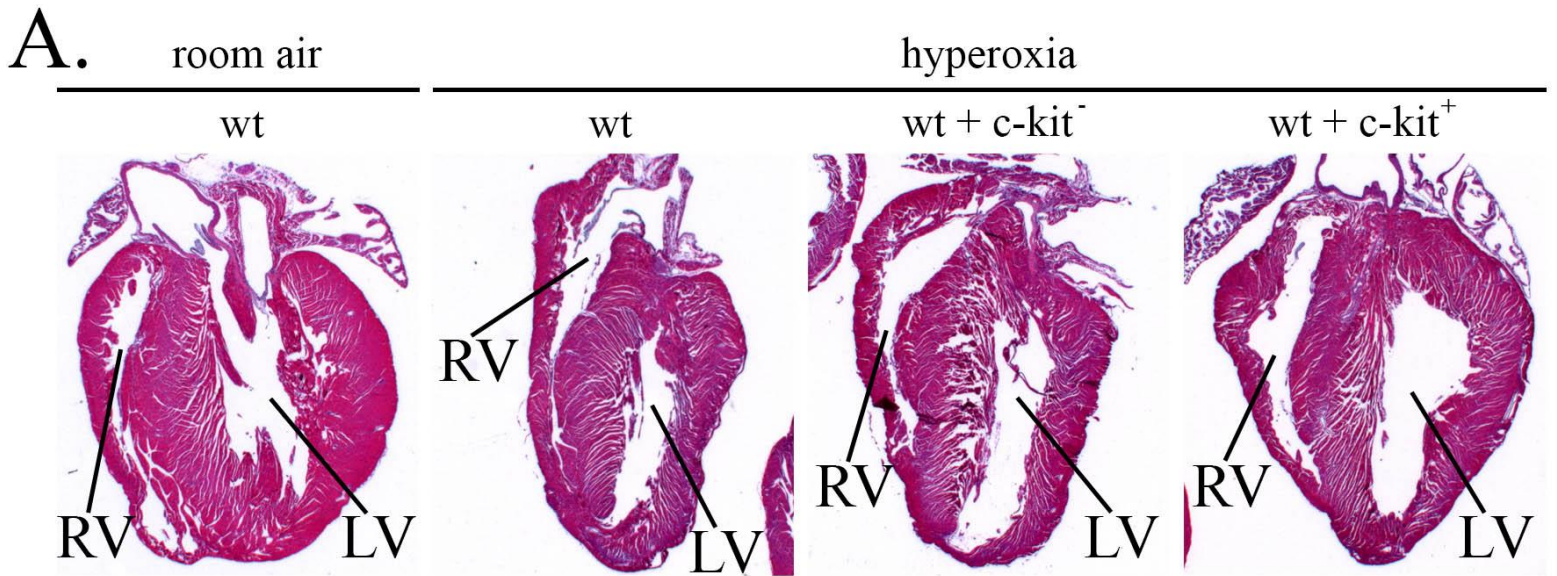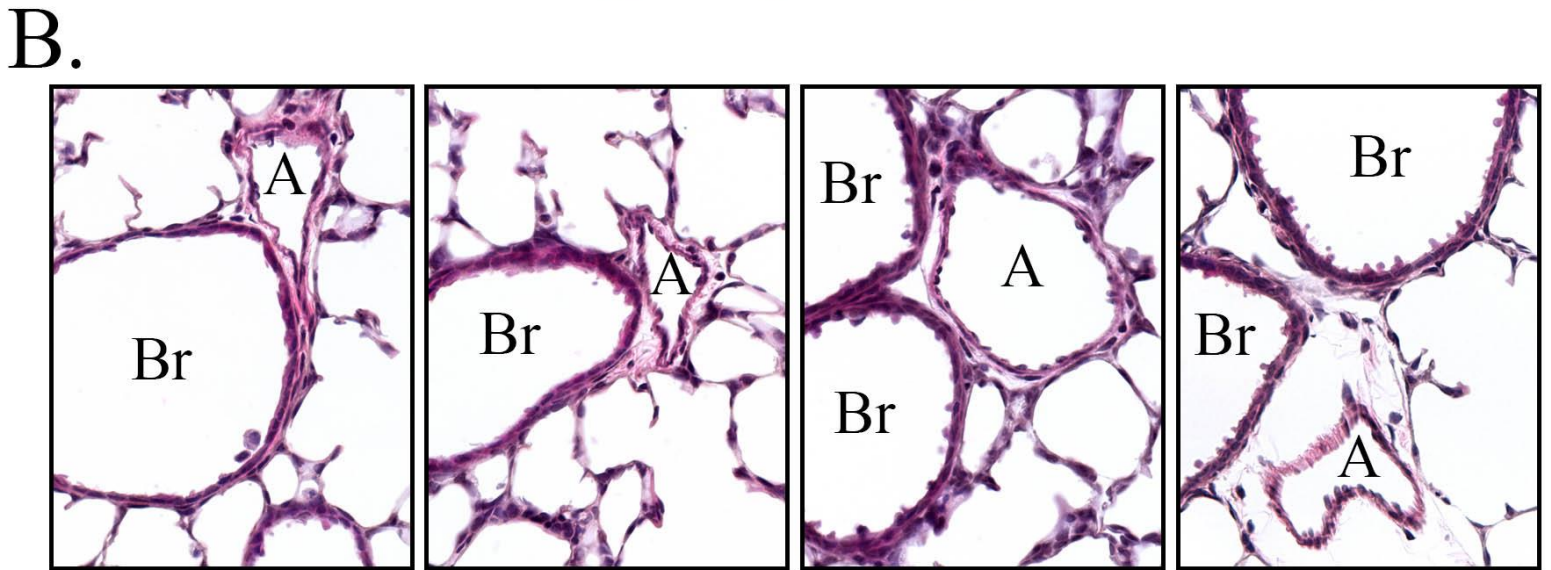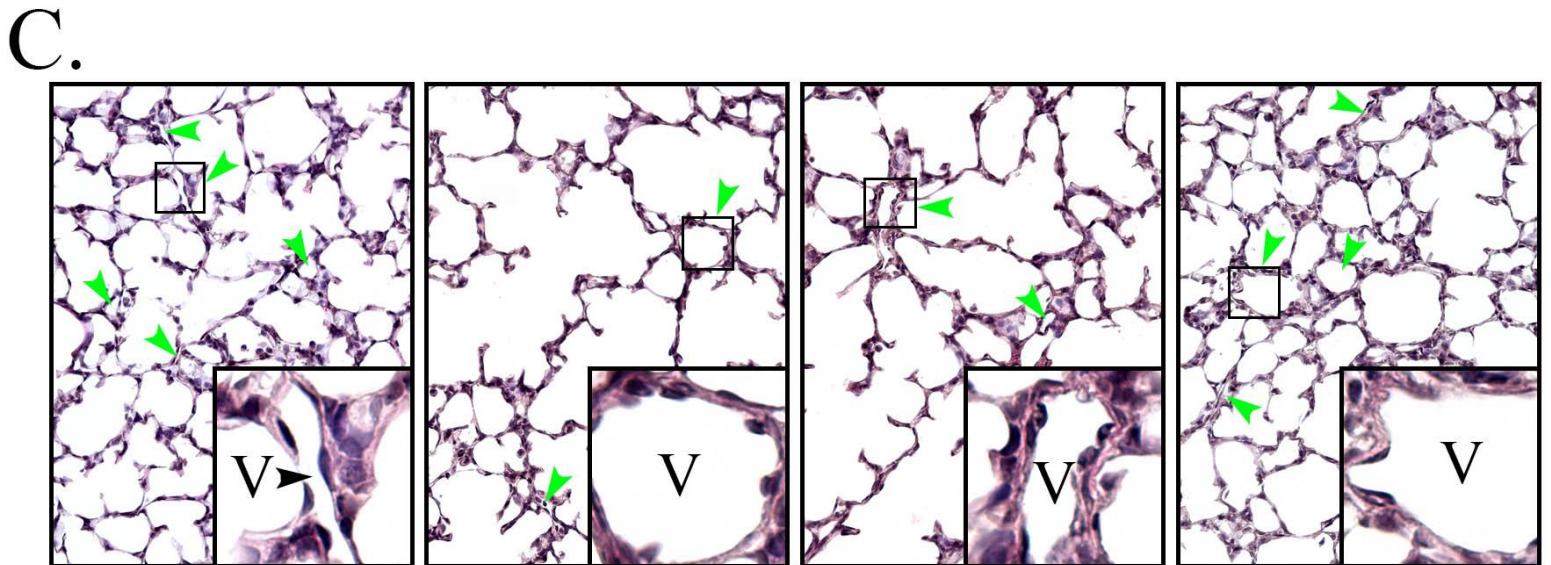

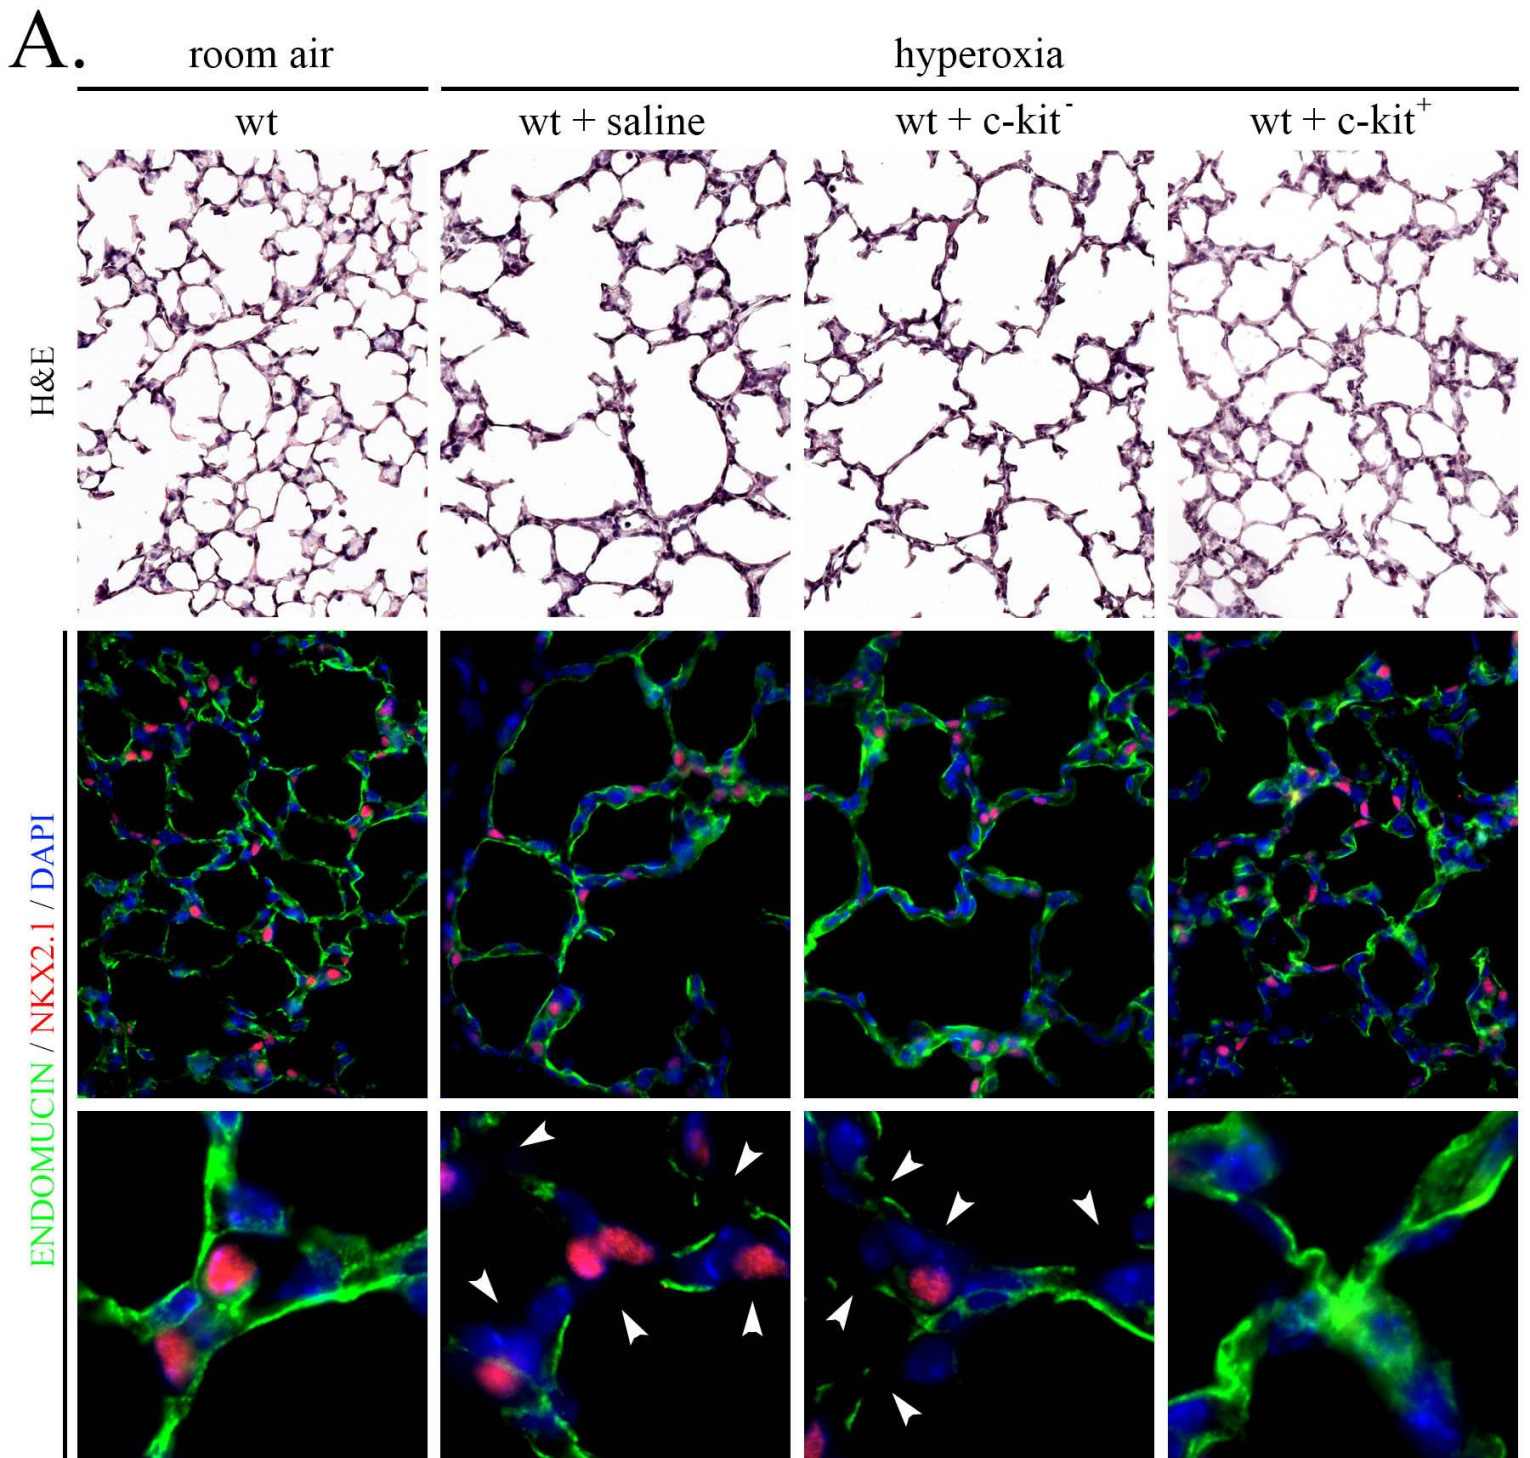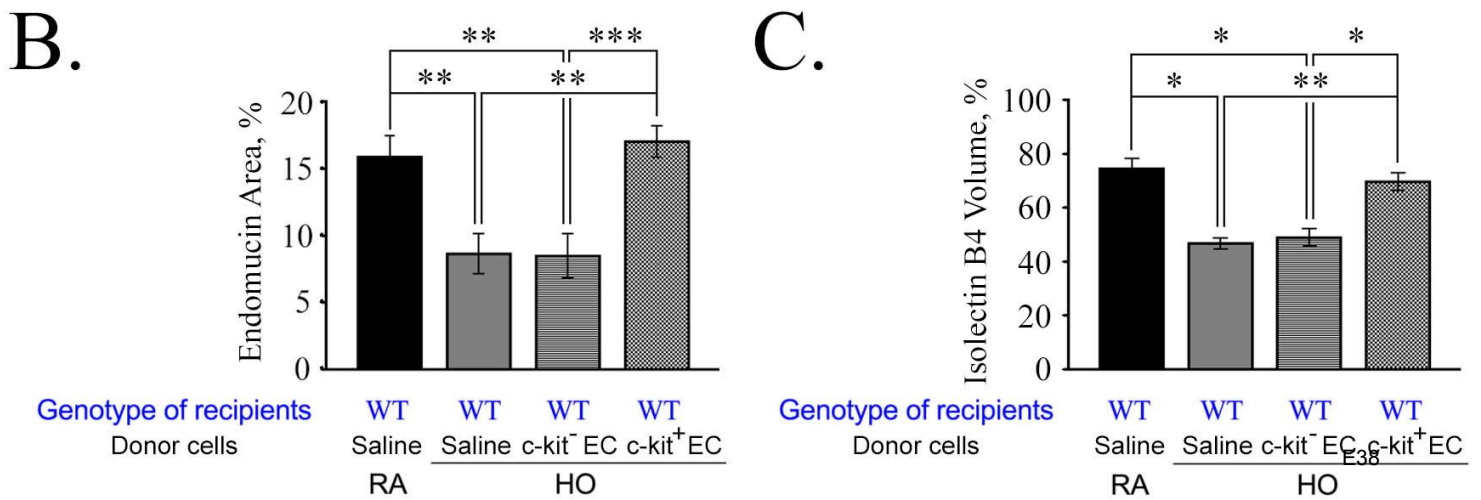

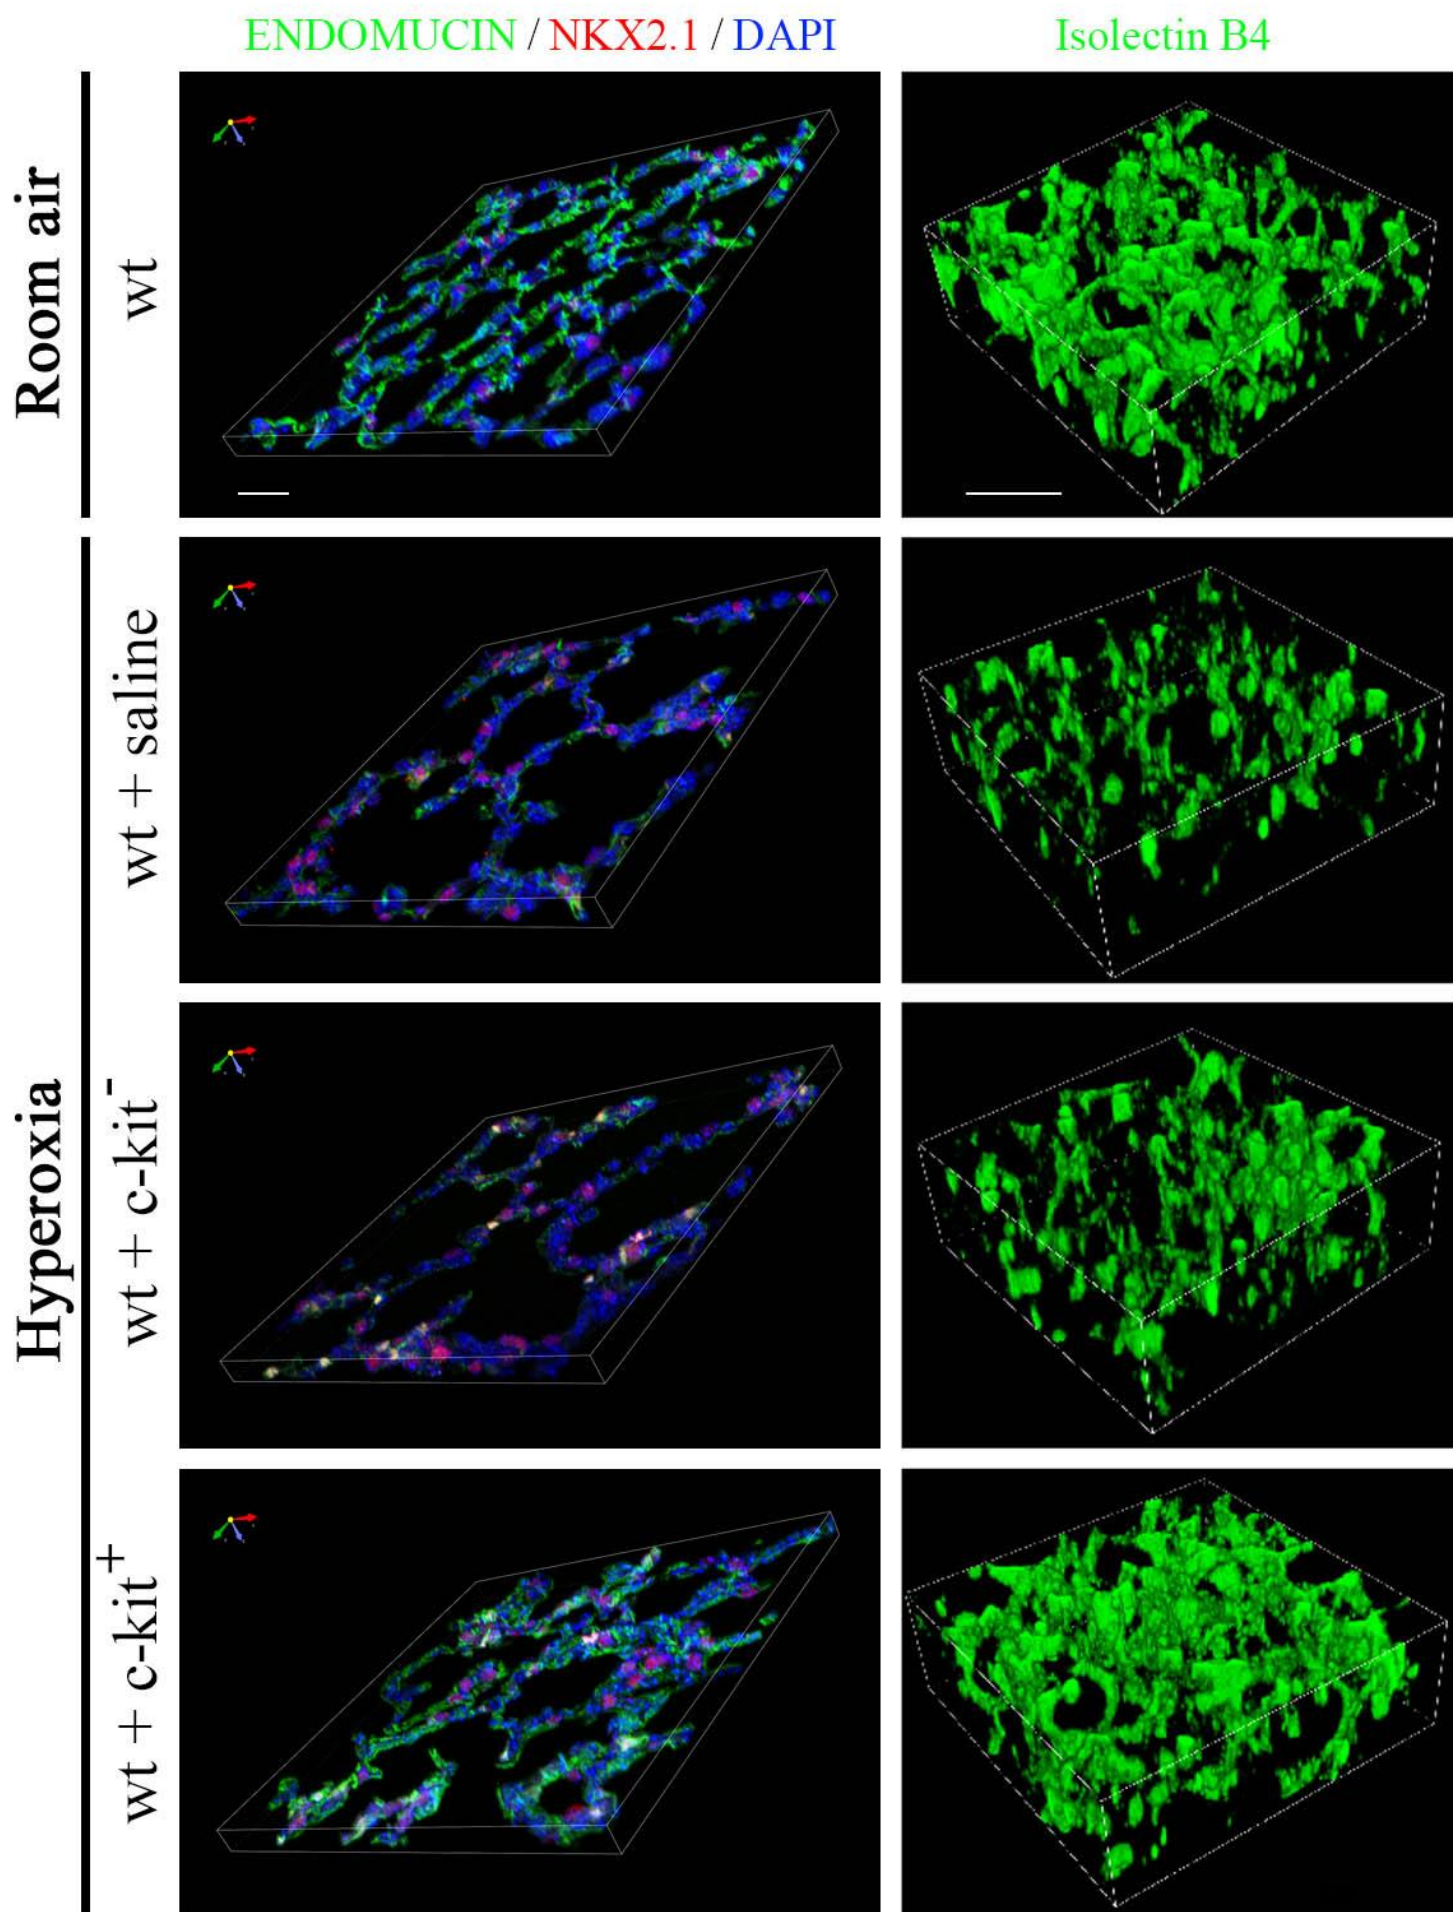

Room air control

Isolectin B4

tdTomato

merged

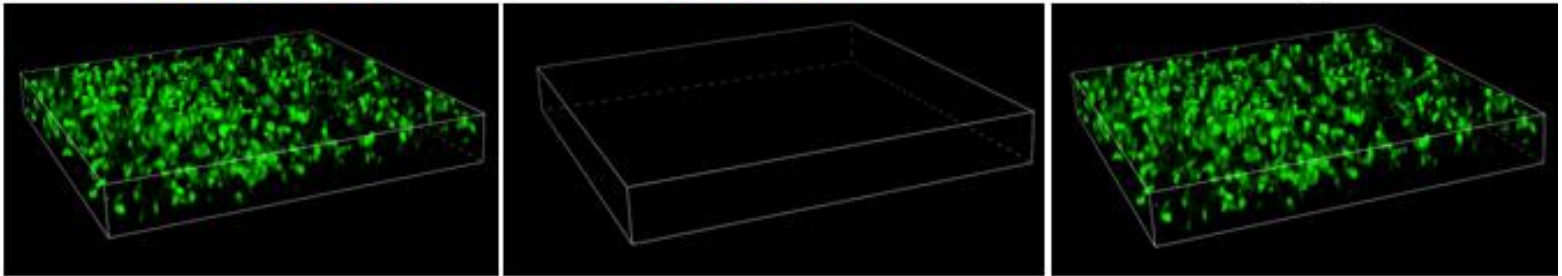

Hyperoxia + c-kit<sup>+</sup> EC transfer

Isolectin B4

tdTomato

merged

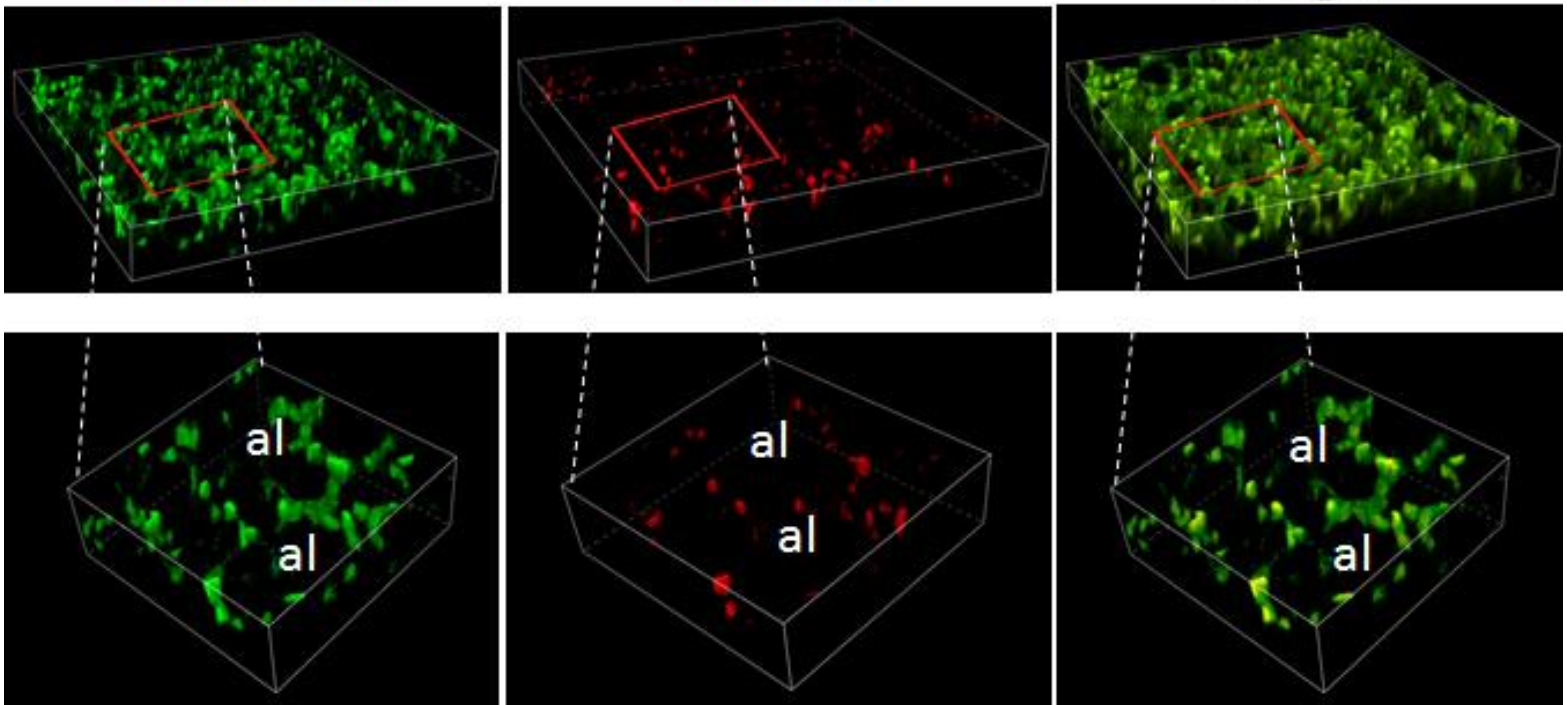



A.

Gated on CD45<sup>-</sup> cells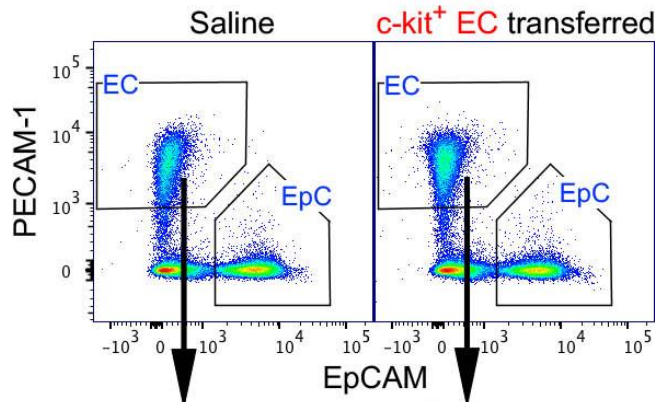

Age when harvest (days)

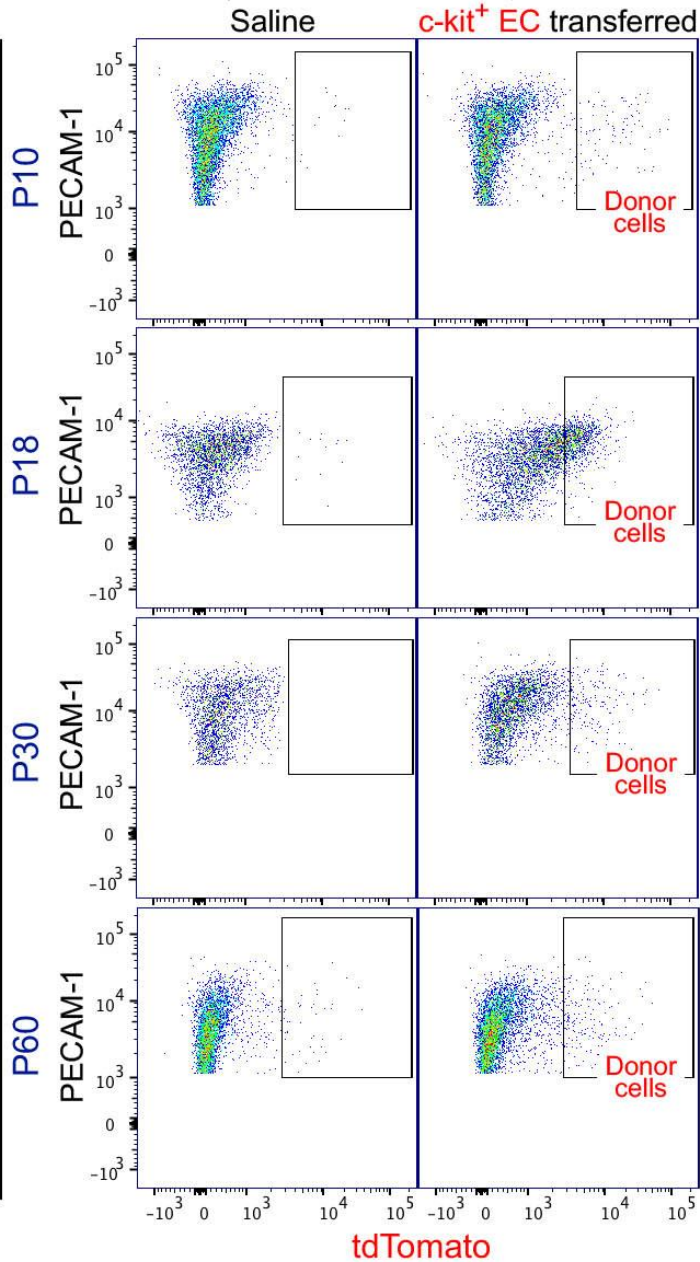

B.

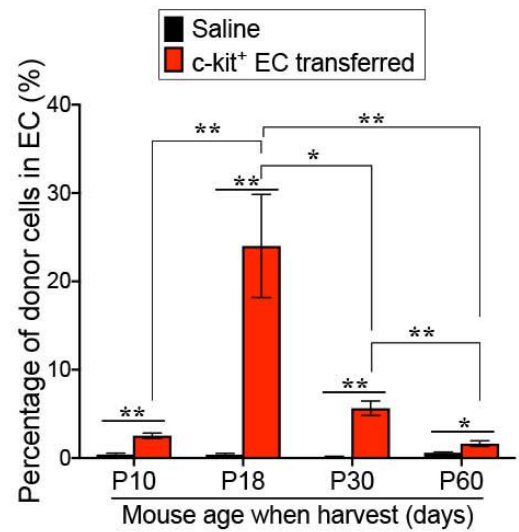

C.

Gated on CD45<sup>-</sup>PECAM-1<sup>+</sup> EC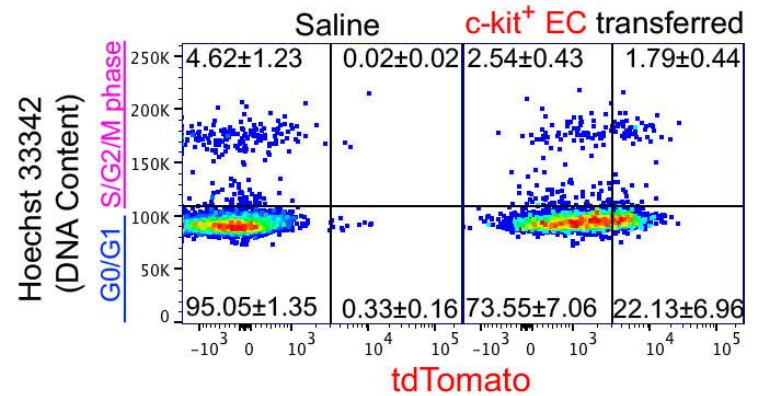

D.

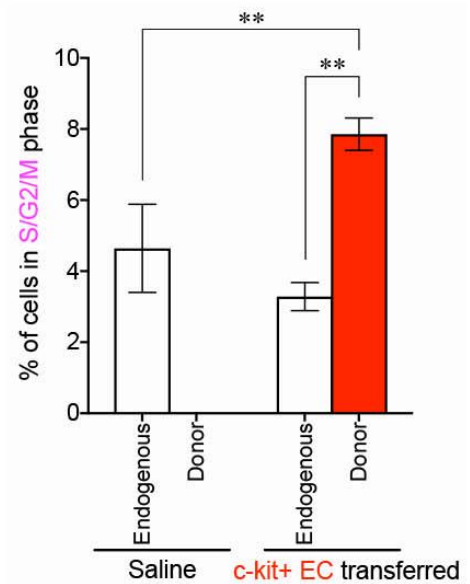

Supplement: rccm.201812-2312OC_ren_data_supplement.pdf [file rccm.201812-2312OC_ren_data_supplement.pdf]
